1           **Interbacterial competition and anti-predatory behavior of**  
2                           **environmental *Vibrio cholerae* strains**

3                           **Natália C. Drebes Dörr and Melanie Blokesch\***

4           Laboratory of Molecular Microbiology, Global Health Institute, School of Life Sciences,  
5           École Polytechnique Fédérale de Lausanne (EPFL), CH-1015 Lausanne, Switzerland

6

7   \*Corresponding author:

8

9   Mailing address:

10   Melanie Blokesch

11   EPFL-SV-UPBLO, Station 19

12   Ecole Polytechnique Fédérale de Lausanne (EPFL)

13   CH-1015 Lausanne, Switzerland

14   Phone: +41 21 693 0653

15   Email: [melanie.blokesch@epfl.ch](mailto:melanie.blokesch@epfl.ch)

16

17   Running title: Toxicity of environmental *Vibrio cholerae* strains

18   Keywords: type VI secretion, hemolysin, *Vibrio cholerae*, amoebae

## 19 **Originality-Significance Statement**

20 This work contributes to the understanding of phenotypic consequences that differentiate  
21 diverse *Vibrio cholerae* strains. We focused on the type VI secretion system (T6SS) and the  
22 pore forming toxin hemolysin, which are tightly regulated in pandemic strains but remain  
23 constitutively active in non-pandemic isolates. We unveiled diverse arrays of T6SS  
24 effector/immunity modules in a set of environmental strains by long-read whole genome  
25 sequencing and *de novo* assembly. These modules determine whether the strains are able to  
26 evade amoebal predation and dictate their level of compatibility or competitiveness with one  
27 another.

28

## 29 **Summary**

30 *Vibrio cholerae* isolates responsible for cholera pandemics represent only a small portion of  
31 the diverse strains belonging to this species. Indeed, most *V. cholerae* are encountered in  
32 aquatic environments. To better understand the emergence of pandemic lineages, it is crucial  
33 to discern what differentiates pandemic strains from their environmental relatives. Here, we  
34 studied the interaction of environmental *V. cholerae* with eukaryotic predators or competing  
35 bacteria and tested the contributions of the hemolysin and the type VI secretion system  
36 (T6SS) to those interactions. Both of these molecular weapons are constitutively active in  
37 environmental isolates but subject to tight regulation in the pandemic clade. We showed that  
38 several environmental isolates resist amoebal grazing and that this anti-grazing defense relies  
39 on the strains' T6SS and its actin-cross-linking domain (ACD)-containing tip protein. Strains  
40 lacking the ACD were unable to defend themselves against grazing amoebae but maintained  
41 high levels of T6SS-dependent interbacterial killing. We explored the latter phenotype  
42 through whole-genome sequencing of fourteen isolates, which unveiled a wide array of novel  
43 T6SS effector and (orphan) immunity proteins. By combining these *in silico* predictions with

44 experimental validations, we showed that highly similar but nonidentical immunity proteins  
45 were insufficient to provide cross-immunity among those wild strains.

46

## 47 **Introduction**

48 Diarrheal diseases can be caused by a variety of microorganisms, including the causative  
49 agent of cholera, *Vibrio cholerae*, which infects up to 4 million people every year (Ali *et al.*,  
50 2015). Cholera often spreads from its endemic area around the Ganges delta and has reached  
51 almost the entire world in the reported seven pandemics that have been witnessed since 1817.  
52 In addition to these pandemics, important localized outbreaks have occurred over the years,  
53 especially following natural disasters (Faruque *et al.*, 1998; World Health Organization  
54 (WHO), 2006; Clemens *et al.*, 2017).

55 *V. cholerae* strains can be classified into serogroups based on more than 200 different  
56 O-antigens. The O1 serogroup is considered the primary cause of previous (e.g., classical  
57 serotype) and ongoing (e.g., El Tor serotype) cholera pandemics (Faruque *et al.*, 1998;  
58 Cottingham *et al.*, 2003). Isolates belonging to the O139 serogroup are genetically related to  
59 the 7<sup>th</sup> pandemic O1 El Tor strains (Johnson *et al.*, 1994) but are rarely associated with  
60 disease outbreaks currently (Faruque *et al.*, 1998; Clemens *et al.*, 2017). Even though this  
61 species is best known due to the life-threatening disease it causes, the vast majority of *V.*  
62 *cholerae* are common members of aquatic habitats. These mostly non-O1/non-O139  
63 serogroup strains are thought to frequently associate with zooplankton and shellfish, and *V.*  
64 *cholerae* uses their chitinous exoskeletons as a source of carbon and nitrogen (Faruque *et al.*,  
65 1998; Cottingham *et al.*, 2003; Kim *et al.*, 2005). Environmental isolates are typically  
66 considered harmless to humans despite reported associations with mild to severe forms of  
67 diarrhea (Islam *et al.*, 1992; Singh *et al.*, 2001; Dziejman *et al.*, 2002, 2005; Onifade *et al.*,  
68 2011; Deshayes *et al.*, 2015; Hasan *et al.*, 2015).

69           A major question, not only in the cholera field but also for infectious diseases in  
70 general, is how pathogenic isolates evolve from their non-pathogenic environmental  
71 progenitors. In the case of *V. cholerae*, pandemic patient isolates are remarkably clonal, in  
72 sharp contrast to the high genomic variability encountered in environmental isolates (Faruque  
73 *et al.*, 1998; Chun *et al.*, 2009; Mutreja *et al.*, 2011; Harris *et al.*, 2012; Domman *et al.*, 2017;  
74 Weill *et al.*, 2017, 2019). Two major genetic features common to all pandemic strains are the  
75 CTX $\Phi$  prophage and the *Vibrio* pathogenicity island (VPI-1 or TCP island). These genetic  
76 elements harbor genes encoding the main virulence factors, e.g., cholera toxin (CTX) and  
77 toxin-coregulated pilus (TCP) (Taylor *et al.*, 1987; Waldor and Mekalanos, 1996). The  
78 possession of these genomic regions, however, is not unique nor a ‘deterministic factor’ of  
79 pandemic strains. In fact, *V. cholerae* samples collected in several regions of the world have  
80 exposed environmental CTX- and/or TCP-positive strains (Rivera *et al.*, 2001; Faruque *et al.*,  
81 2003, 2004; Gennari *et al.*, 2012; Bernardy *et al.*, 2016; Shapiro *et al.*, 2016). Additionally,  
82 *V. cholerae* strains that have caused localized cholera outbreaks without reaching pandemic  
83 levels have been reported, such as the O37 serogroup strains V52 and ATCC25872 (Aldova  
84 *et al.*, 1968; Boyd and Waldor, 2002; Cottingham *et al.*, 2003; Chun *et al.*, 2009). Therefore,  
85 the terms “toxigenic” (ability to cause cholera) and “pandemic” (here, current 7<sup>th</sup> pandemic-  
86 causing O1 El Tor strains) are not synonymous. What exactly determines whether strains  
87 become pandemic or not is still not fully understood and probably involves diverse aspects  
88 ranging from genetic content and strain-specific phenotypes, along with the location of the  
89 initial outbreaks and ultimately towards social and sanitary factors, to name a few. Pertinent  
90 to the bacteria-related aspects, previous studies hypothesized the existence of virulence  
91 adaptive polymorphisms (VAP) circulating in environmental strains. These VAPs were  
92 suggested to be a prerequisite for pandemic transition before the horizontal acquisition of  
93 CTX $\Phi$  and VPI-1 (Shapiro *et al.*, 2016).

94 To better understand their emergence, the differences between pandemic strains and  
95 their environmental relatives need to be deciphered. Such differences most likely include  
96 phenotypic alterations that are not easily predictable by genomics. In the context of  
97 phenotypic variation, two minor virulence factors, namely, the type VI secretion system  
98 (T6SS) and the pore-forming toxin hemolysin, are of special interest as they are differentially  
99 produced in pandemic compared with non-pandemic toxigenic or environmental strains. The  
100 T6SS is a molecular killing device that resembles an inverted contractile bacteriophage tail  
101 and it is present in approximately 25% of all Gram-negative bacteria (Ho *et al.*, 2014;  
102 Cianfanelli *et al.*, 2016; Galán and Waksman, 2018; Taylor *et al.*, 2018). It is composed of a  
103 membrane-spanning portion, a tube structure made of stacks of Hcp hexamer rings, and a  
104 tube-surrounding sheath. The sheath is composed of the two proteins VipA and VipB which,  
105 upon contraction, propels the inner tube out of the cell together with its effector-decorated tip  
106 proteins (VgrG and PAAR) (Zoued *et al.*, 2014; Cherrak *et al.*, 2019; Flaughnatti *et al.*, 2020).  
107 Secreted Hcp therefore serves as an indicator of T6SS activity (Pukatzki *et al.* 2006; Basler *et*  
108 *al.*, 2012; Bröms *et al.*, 2013; Kube *et al.*, 2014). The secreted effector proteins mostly target  
109 conserved cellular components, such as membranes, bacterial peptidoglycan, nucleic acids, or  
110 the eukaryotic cytoskeleton (Hood *et al.*, 2010; Russell *et al.*, 2014). T6SS effectors can be  
111 either secreted as (i) cargos that interact with T6SS structural proteins, such as Hcp or the tip  
112 protein VgrG; or as (ii) C-terminal extensions of VgrG, Hcp, or PAAR (so-called “evolved”  
113 proteins; Pukatzki *et al.*, 2006, 2009; Hachani *et al.*, 2016). Notably, T6SS-producing  
114 bacteria protect themselves against their toxic effector repertoire by the production of  
115 effector-cognate immunity proteins. These effector/immunity (E/I) pairs are usually encoded  
116 adjacent to each other (Russell *et al.*, 2011; Brooks *et al.*, 2013; Dong *et al.*, 2013;  
117 Unterweger *et al.*, 2014).

118           In current pandemic strains, the T6SS is encoded by four gene clusters: the large  
119 cluster and three auxiliary clusters. The large cluster primarily codes for structural proteins  
120 (recently reviewed by Crisan and Hammer, 2020), including the evolved tip protein VgrG3,  
121 which possesses a C-terminal lysozyme-like domain for peptidoglycan degradation (Zheng *et al.*,  
122 2011; Brooks *et al.*, 2013). Auxiliary clusters 1 and 2 are both composed of genes  
123 encoding Hcp and VgrG (evolved in cluster 1 and structural in cluster 2), an adaptor protein  
124 (Tap1 or VasW; Liang *et al.*, 2015; Unterweger *et al.*, 2015) and an E/I module. The  
125 auxiliary cluster 1 effector TseL is a bifunctional lipase with anti-bacterial and anti-  
126 eukaryotic activity (Zheng *et al.*, 2011; Dong *et al.*, 2013; Russell *et al.*, 2013). The auxiliary  
127 cluster 2 effector VasX acts as a pore-forming toxin due to its bacterial/eukaryotic colicin-  
128 like membrane-disrupting activity (Miyata *et al.*, 2011, 2013; Russell *et al.*, 2014). Finally,  
129 the T6SS auxiliary cluster 3 is composed of genes encoding a second copy of PAAR (a tip-  
130 sharpening protein that extends from VgrG; the first gene copy is at the start of the large  
131 cluster; Shneider *et al.*, 2013) and a single E/I pair. When discovered, the aux 3 effector TseH  
132 was predicted to contain a hydrolase domain (Altindis *et al.*, 2015), while the recently  
133 reported crystal structure supported its role as a papain-like NlpC/P60 peptidase (Hersch *et al.*,  
134 2020) with structural similarity to the T6SS effector Tse1 of *Pseudomonas aeruginosa*  
135 that contains bacteriolytic peptidoglycan amidase activity (Chou *et al.*, 2012).

136           Another toxic protein that shows differential activity in pandemic compared with non-  
137 pandemic *V. cholerae* strains is the hemolysin protein (HlyA), which is likewise widespread  
138 among *Vibrio* species (Zhang and Austin, 2005). HlyA is considered a minor virulence factor  
139 as it contributes to toxicity in the context of intestinal infections (Ichinose *et al.*, 1987;  
140 Olivier *et al.*, 2007). We previously showed that the proper timing of HlyA activity is a  
141 prerequisite for pandemic *V. cholerae* to establish a replication niche within the aquatic

142 amoeba *Acanthamoeba castellanii*, while constitutive activity kills this host prematurely (Van  
143 der Henst *et al.*, 2018).

144 In this study, we deciphered phenotypic and genotypic differences between O1 El Tor  
145 pandemic strains and 15 environmental *V. cholerae* isolates. With respect to phenotypes, we  
146 focused primarily on T6SS- and hemolysin-specific outcomes exerted on competing bacteria  
147 or amoebal predators. We show that clade-specific anti-amoebal toxicity is dependent on the  
148 actin-cross-linking domain of a subset of T6SS effector proteins and that HlyA does not harm  
149 these predators under the tested conditions. Anti-bacterial activity, on the other hand, is  
150 widespread among the environmental isolates and is based on their constitutive T6SS  
151 production, which is a major phenotypic difference compared with the exquisitely regulated  
152 T6SS of pandemic *V. cholerae*. We also performed long-read PacBio whole-genome  
153 sequencing of the environmental isolates, which allowed us to perform basic comparative  
154 genomic analyses. Through this approach, we identified T6SS E/I modules as well as orphan  
155 immunity loci. Finally, we experimentally tested how the environmental isolates compete  
156 with one another and how this interbacterial competition correlates with their T6SS E/I  
157 repertoire.

158

## 159 **Results and discussion**

### 160 **Genome sequencing of environmental *V. cholerae* strains**

161 Apart from the major virulence factors, previous observations suggested important  
162 phenotypic differences between pandemic and environmental *V. cholerae* strains. We  
163 therefore decided to study fifteen environmental isolates (Table S1) from diverse habitats  
164 along the central California coast, a region that is free of endemic or epidemic cholera. These  
165 strains were initially isolated in 2004 by Keymer and colleagues followed by basic  
166 characterization and comparative genome hybridization (CGH) analyses (Keymer *et al.*,

167 2007; Miller *et al.*, 2007). The latter approach was based on amplicon microarrays  
168 (representing 3,357 of 3,891 annotated open reading frames), which were designed using the  
169 first published *V. cholerae* genome sequence as a template, namely, pandemic O1 El Tor  
170 strain N16961 (Heidelberg *et al.*, 2000). Based on the presence or absence of the microarray-  
171 templated genes, the strains were classified into four clades (A-D) (Keymer *et al.*, 2007;  
172 Miller *et al.*, 2007), a classification we maintained throughout the current report. To better  
173 understand the accessory genome, including the T6SS E/I modules and to identify those  
174 genes that are novel when compared with strain N16961, we first whole-genome sequenced  
175 these strains using a long-read PacBio approach followed by the *de novo* assembly of their  
176 genomes. As a representative strain of the 7<sup>th</sup> cholera pandemic, we used strain O1 El Tor  
177 A1552 throughout this study (Yildiz and Schoolnik, 1998). This strain is connected to a  
178 cholera outbreak in Peru in the 1990s. We recently reported its genome sequence, including  
179 more than 1,000 manual gene annotations, according to previous experimental validations  
180 (Matthey *et al.*, 2018).

181 Table S2 shows the sequencing details and the features of the closed genomes of the  
182 15 environmental isolates. All genomes showed the dual chromosome architecture that is  
183 common for *Vibrio* species (Okada *et al.*, 2005), a similar overall size of the two  
184 chromosomes, and average GC percentages within the same range as the one observed for the  
185 pandemic *V. cholerae* strains N16961 and A1552 (Heidelberg 2000; Matthey *et al.*, 2018).  
186 The assembly pipeline also predicted megaplasmids of ~300kbp and 80kbp for four strains  
187 belonging to clades C and D, respectively. It should be noted that due to the size selection of  
188 the prepared sequencing libraries, putative smaller plasmids remained unidentified.  
189 Interestingly, we observed that the genomes of strains W6G and W7G were almost identical.  
190 This reflects the previous report by Keymer *et al.* In their original sampling study, the authors  
191 claimed that, based on CGH, 30 unique genotypes were identified within their collection of



192 41 environmental strains, while several genotypes were sampled multiple times from distinct  
193 sampling events. Indeed, upon direct comparison of the W6G and W7G genomes, we  
194 observed identities of 99.98%, 99.997% and 99.998% for chromosome 1, chromosome 2, and  
195 the megaplasmid, respectively. Both strains possessed the same genes in all three replicons,  
196 and the few observed differences were primarily single nucleotides indels (which might, in  
197 part, reflect sequencing artifacts). These data suggest almost clonality between these two  
198 environmental samples (W6G and W7G). In addition, our whole-genome sequencing data  
199 showed that strains E7G and SA7G of clade D also had high levels of identity, which again  
200 confirmed the previous CGH data (Keymer *et al.*, 2007). The majority of other strains  
201 differed more significantly and therefore allowed us to test links between specific phenotypes  
202 and the corresponding genotypes.

203

#### 204 **Only a subset of environmental isolates block amoebal predation**

205 We initially wondered how these environmental isolates would behave when confronted with  
206 predatory grazers, such as bacterivorous amoebae. We therefore tested the representative 7<sup>th</sup>  
207 pandemic strain A1552 and the above-described collection of environmental strains for their  
208 ability to defend themselves against the grazing soil amoeba *Dictyostelium discoideum*. As  
209 shown in Figure 1A, a clade-specific behavior was observable in which strains from clade A  
210 and B appeared as non-toxic to *D. discoideum* and were efficiently grazed on while clade C  
211 and D strains completely resisted amoebal grazing. We concluded that anti-amoebal defenses  
212 significantly vary among the different environmental *V. cholerae* isolates.

213

214 **Enhanced hemolysin production in environmental *V. cholerae* does not contribute to**  
215 **their anti-amoebal behavior**

216 As we observed that a subset of the environmental strains had a strong anti-amoebal effect,  
217 we wondered whether this grazing inhibition was linked to toxic effectors of *V. cholerae*. Our  
218 group had previously demonstrated that the proper timing of the production or activity of the  
219 pore-forming toxin hemolysin HlyA was essential for pandemic *V. cholerae* to form a  
220 replication niche inside the aquatic amoebae *A. castellanii*. Indeed, while pandemic *V.*  
221 *cholerae* exerted a tight regulation over this toxin and thereby successfully infected the  
222 amoebae's contractile vacuole, constitutive hemolysin activity by the environmental isolates  
223 killed the host prematurely, preventing the formation of this replication niche (Van der Henst  
224 *et al.*, 2018). We speculated that hemolysin activity could also be involved in the resistance  
225 against *D. discoideum* grazing that we observed for the environmental strains from clades C  
226 and D. To follow up on this hypothesis, we first tested all environmental WT strains for  
227 hemolysis on blood agar plates. As shown in Figure 1B, all isolates had strong hemolytic  
228 activity, especially when compared with the pandemic strain A1552. To ensure that the  
229 hemolysis was indeed caused by HlyA's activity, we interrupted the *hlyA* gene (loci  
230 comparable to locus tag VCA0219 in reference strain N16961) in a subset of the  
231 environmental strains through the integration of an antibiotic resistance cassette (the wild-  
232 type (WT) versions of the environmental strains as well as their respective mutants are listed  
233 in Table S1). The selection of this subset of environmental isolates was thereby based on two  
234 criteria: i) to represent each clade; and ii) to select those strains that showed efficient chitin-  
235 induced natural transformability, which allowed for genetic manipulation of those strains. For  
236 these representative strains, we confirmed that the observed blood cell lysis was indeed  
237 caused by the specific hemolysin HlyA (Fig. 1C). After this confirmation, we tested the  
238 strains in the amoebal grazing assay. However, to our surprise, the hemolysin-deficient  
239 mutants behaved the same way as their parental WT strains, indicating that HlyA is not  
240 responsible for the strong anti-amoebal behavior that we observed for the clade C and D

241 strains (Fig. 1D). These results therefore suggest that, at least under the tested conditions,  
242 HlyA does not play an important role in anti-amoebal grazing defense.

243

#### 244 **Environmental isolates constitutively produce T6SS**

245 As HlyA activity was ruled out as a defense mechanism, we moved on to check the potential  
246 involvement of other molecular weapons. We next considered the T6SS, due to its  
247 widespread occurrence in Gram-negative bacteria. Notably, *V. cholerae*'s T6SS was initially  
248 discovered due to its anti-eukaryotic activity that allowed the non-pandemic *V. cholerae*  
249 strain V52 to avoid predation by *D. discoideum* (Pukatzki *et al.*, 2006). Indeed, previous  
250 studies had indicated that, in contrast to the 7<sup>th</sup> pandemic strains, non-pandemic toxigenic *V.*  
251 *cholerae* (such as the two O37 serogroup strains V52 and ATCC25872; Pukatzki *et al.*, 2006;  
252 Basler *et al.*, 2012; Van der Henst *et al.*, 2018) as well as environmental isolates (Unterweger  
253 *et al.*, 2012; Bernardy *et al.*, 2016; Crisan and Hammer, 2020) maintain constitutive T6SS  
254 activity. This is in contrast to the silenced T6SS of pandemic strains, which are primarily  
255 induced by chitin or low c-di-GMP levels, concomitantly with natural competence and the  
256 production of extracellular enzymes, respectively (Borgeaud *et al.*, 2015; Watve *et al.*, 2015;  
257 Metzger and Blokesch, 2016; Metzger *et al.*, 2016; Veening and Blokesch, 2017). To check  
258 whether the T6SS protects clade C and D strains, we first tested the general T6SS activity of  
259 the environmental isolates. As shown in Figure 2A, we observed that the environmental  
260 strains efficiently eradicated *Escherichia coli* prey bacteria. Only strain SA3G of clade B  
261 reproducibly killed prey with a reduced efficiency, even though residual T6SS activity was  
262 still observed when compared with the nonkilling pandemic strain A1552 (Fig. 2A).  
263 However, these data alone do not unambiguously show whether the observed prey  
264 effacement was indeed T6SS-dependent or was instead the result of any other modes of  
265 interbacterial competition, such as contact-dependent inhibition, toxin secretion, bacteriocins,

266 etc. (Hibbing *et al.*, 2010; Stubbendieck and Straight, 2016; Granato *et al.*, 2019). We  
267 therefore deleted the T6SS sheath protein-encoding gene *vipA* in each of the clade-  
268 representing strains and confirmed their lost T6SS activity by scoring for Hcp secretion. As  
269 illustrated in Figure 2B, all strains were able to produce Hcp protein but only the T6SS-active  
270 parental environmental strains were able to also secrete this protein into the supernatant.  
271 These data are therefore in agreement with the idea that the strains' T6SS is indeed  
272 constitutively active (at least under the tested conditions) and is the reason behind the  
273 observed interbacterial killing phenotype (Fig. 2A). We confirmed the latter idea by  
274 comparing the WT and *vipA*-minus derivatives' killing ability in an interbacterial competition  
275 assay using *E. coli* as prey (Fig. 2C).

276

### 277 **Environmental strains use their VgrG-linked ACD of the T6SS to fight amoebae**

278 Having recognized that all environmental strains constitutively produce their T6SS, we  
279 moved on to assess the involvement of this machinery in the anti-amoebal defense of clade C  
280 and D strains. Indeed, the observed inhibition of amoebal plaque formation by a subset of the  
281 environmental isolates was consistent with previous work by Unterweger and colleagues  
282 (Unterweger *et al.*, 2012). These authors had studied four environmental isolates from  
283 estuaries of the Rio Grande delta for anti-amoebal and anti-bacterial activity and observed  
284 that two of these isolates could not resist amoebal predation. These strains were, however,  
285 also unable to kill *E. coli* prey, and the reason for this interbacterial noncompetitiveness was  
286 a frameshift mutation in the intermediate T6SS regulatory protein-encoding gene *vasH*  
287 (Pukatzki *et al.*, 2006; Unterweger *et al.*, 2012). In contrast, apart from one exception (strain  
288 SA3G), all of the tested environmental isolates in our study efficiently eradicated *E. coli* prey  
289 (Fig. 2A), indicating that the T6SS was, in general, functional and active. We therefore  
290 reassessed the amoebal plaque formation against the genetically modified T6SS mutant

291 strains. As shown in Figure 2D, clade C and D isolates, whose parental WT strains  
292 completely blocked amoebal predation, became nontoxic when their T6SS was inactivated,  
293 indicating that their anti-amoebal defense was indeed linked to the T6SS and uniquely caused  
294 by the latter.

295         Considering that all of the environmental isolates have a constitutively active T6SS  
296 under the tested conditions and efficiently killed other bacteria (Fig. 2A), we wondered why  
297 only the strains from clades C and D were able to use their T6SS as an anti-eukaryotic  
298 defense tool. To answer this question and to also characterize the full E/I modules of these  
299 strains, we inspected the T6SS clusters in the new genomic sequencing data and observed a  
300 clear clade specificity. Only those strains belonging to clades C and D encoded evolved  
301 VgrG1 proteins with a C-terminal actin cross-linking domain (ACD) (Figs. 2 and 3; Table  
302 S3). Strains from clades A and B, on the other hand, encoded only structurally relevant  
303 VgrG1 proteins without an evolved effector domain. Importantly, pandemic strains also  
304 encoded such an ACD as part of *vgrG1*, but, as noted above, these strains do not produce  
305 functional T6SSs without specific environmental cues and therefore show neither anti-  
306 bacterial (Fig. 2A) nor anti-amoebal behavior (Fig. 2D) under the tested conditions.

307         The ACD of VgrG1 in non-pandemic but toxigenic O37 serogroup strain V52 (Chun  
308 *et al.*, 2009), which produces its T6SS constitutively, was previously shown to be involved in  
309 *V. cholerae*'s toxicity towards *D. discoideum* and macrophages (Pukatzki *et al.*, 2006, 2007;  
310 Ma *et al.*, 2009). Moreover, this VgrG1-ACD was also responsible for intestinal  
311 inflammation and cholera toxin-independent fluid accumulation in an infant mouse model of  
312 infection (Ma and Mekalanos, 2010). Furthermore, the VgrG1-ACD of the 7<sup>th</sup> pandemic *V.*  
313 *cholerae* strain C6706 was implicated in alternating intestinal peristalsis of zebrafish larvae,  
314 leading to the expulsion of preinoculated commensal bacteria (Logan *et al.*, 2018). However,  
315 this effect was only observable upon constitutive T6SS expression using a genetically

316 engineered derivative of this pandemic strain in which T6SS production occurred based on  
317 artificial expression of the gene encoding the quorum sensing- and chitin-linked transcription  
318 factor QstR (Lo Scrudato and Blokesch, 2013; Borgeaud *et al.*, 2015; Watve *et al.*, 2015;  
319 Jaskólska *et al.*, 2018; Logan *et al.*, 2018).

320         Given this previous work on toxigenic strains, we tested whether the ACD of the clade  
321 C and D environmental isolates was likewise causative of the observed anti-amoebal  
322 response. To do so, we first generated truncated versions of VgrG1 that lacked the evolved  
323 ACD domain-containing C-terminus (Fig. 2E). Importantly, these vgrG1 $\Delta$ ACD strains  
324 maintained their full anti-bacterial competitiveness (Fig. 2F), which indicates that the ACD  
325 deletion did not impact the general assembly and/or activity of the T6SS machinery.  
326 However, as shown in Figure 2G, the amoebal grazing ability was restored on the lawns  
327 formed by the two vgrG1 $\Delta$ ACD environmental *V. cholerae* strains and resulted in equal (e.g.,  
328 for strain SL6Y) or intermediate (e.g., strain SA10G) amoebal plaque numbers compared  
329 with those numbers observed for complete T6SS-defective mutants. The non-pandemic but  
330 toxigenic control strain ATCC25872 (Table S1; Aldova *et al.*, 1968), which, like strain V52,  
331 is constitutive T6SS active (Van der Henst *et al.*, 2018), also lost its anti-amoebal activity in  
332 the absence of the T6SS core structure or when the ACD of VgrG1 was missing (Fig. 2G).  
333 We therefore concluded that some environmental *V. cholerae* might have evolved ACD-  
334 extended VgrG-encoding genes, as the ACD's anti-eukaryotic activity protects them from  
335 environmental grazers. Whether pandemic strains subsequently horizontally acquired the  
336 ACD encoding region as previously suggested (Kirchberger *et al.*, 2017), or whether the last  
337 common ancestor between the pandemic and environmental lineages already contained this  
338 specialty, that was later then lost from some wild strains, is currently unclear.

339

340 **Diversity of T6SS effectors in environmental *V. cholerae* isolates**

341 As briefly mentioned in the previous section, the ACD-minus mutant of the clade D strain  
342 SA10G showed reduced but still significant residual T6SS-dependent anti-amoebal activity.  
343 We therefore wondered whether this could be explained by the presence of another anti-  
344 eukaryotic effector in one or several of the T6SS clusters. Furthermore, we were also  
345 interested in characterizing the full set of E/I modules in these strains, which would allow us  
346 to speculate about the strains' competitive potential against one another. Using the newly  
347 assembled genomic data together with the previously reported genome sequence of clade B  
348 strain SA5Y (Matthey *et al.*, 2018; Matthey *et al.*, 2019) we determined the E/I modules of  
349 these 15 environmental strains and predicted their function based on BlastP analyses (Fig. 3  
350 and Table S3). Moreover, to arrange the E/I pairs into putative compatible groups, we defined  
351 their modules based on a percentage amino-acid identity of at least 30%, which is a typing  
352 approach previously applied (Unterweger *et al.*, 2014; Kirchberger *et al.*, 2017).  
353 Interestingly, we found evidence for several orphan immunity genes, meaning immunity  
354 genes that no longer coexisted with and were adjacent to a cognate effector-encoding gene, as  
355 had been previously reported by Kirchberger and colleagues (Kirchberger *et al.*, 2017). These  
356 orphan genes were located in the 3' regions of the T6SS clusters and were likewise classified  
357 according to their module type (Fig. 3 and Table S3). The characterization of the E/I modules  
358 and orphan immunity loci was restricted to the well-characterized T6SS clusters of *V.*  
359 *cholerae* (e.g., the large cluster as well as auxiliary clusters 1 and 2), as the reported auxiliary  
360 cluster 3 (E/I pair TseH/TseI; Altindis *et al.*, 2015) was absent from all environmental  
361 isolates. This finding is consistent with a preprinted study showing that this auxiliary cluster  
362 represents a pandemic strain-associated mobile genetic element (Santoriello *et al.*, 2019)  
363 (Fig. 3 and Table S3). Moreover, the recently characterized auxiliary clusters 4 and 5 were  
364 also absent from the environmental isolates (Labbate *et al.*, 2016; Crisan *et al.*, 2019).  
365 Instead, automatic annotations linked to a manual analysis identified the presence of a novel

366 T6SS cluster in strain SP7G (clade C), which we defined as auxiliary cluster 6 (Fig. 3, Fig.  
367 S1, and Table S3). This cluster resides in the small chromosome 2 of strain SP7G and has the  
368 same gene order as auxiliary clusters 1 and 2, namely: *hcp*, *vgrG*, a putative adaptor-protein  
369 encoding gene (coding for a DUF4123 domain as described for Tap1 and VasW; Liang *et al.*,  
370 2015; Unterweger *et al.*, 2015) plus two genes encoding proteins of unknown function, which  
371 we speculate represent an E/I pair. However, BlastP analysis identified no significant  
372 homologous proteins. Interestingly, our search for aux 6 cluster in the PATRIC nucleotide  
373 sequence database (Wattam *et al.*, 2017) suggested that this cluster is prominently  
374 represented in several *V. cholerae* strains, including 2013 environmental isolates from  
375 Bangladesh and an O35 strain (1311-69) isolated in 1969 from a patient in India (Bishop-  
376 Lilly *et al.*, 2014).

377 In the large T6SS cluster, pandemic *V. cholerae* strains, such as A1552 carry an A-  
378 type E/I module (Fig. 3 and Table S3), for which, in fact, the peptidoglycan cell wall  
379 degradation effector corresponds to the C-terminal domain of the evolved VgrG3 protein  
380 (Zheng *et al.*, 2011; Brooks *et al.*, 2013). When analyzing this locus in the environmental *V.*  
381 *cholerae* isolates, we noticed that the evolved nature of VgrG3 was conserved among these  
382 strains, except for clade C strain SP7G in which VgrG3 is solely a structural T6SS  
383 component that is followed by a B-type E/I module. How this effector is attached to the VgrG  
384 tip protein is, however, unclear, as no adaptor protein such as those encoded by *tapI* and  
385 *vasW* could be identified. This B-type effector is predicted to have a cellular adhesion  
386 function (Unterweger *et al.*, 2014). Interestingly, strains W10G (clade A) and SA3G (clade  
387 B) contain a pandemic-like A-type E/I module (Fig. 3), while the other strains carried a wide  
388 variety of E/I pairs, as described in detail in Table S3. Moreover, even though the amino acid  
389 identity of these effectors is below 30% when comparing different types, most of them have a  
390 common predicted function, namely, peptidoglycan degradation (Table S3). Therefore, with



391 the exception of strain SP7G, all the environmental isolates have a dedicated anti-bacterial  
392 E/I module in the T6SS large cluster (Fig. 3 and Table S3). Interestingly, pairwise  
393 comparisons of the effector and immunity protein sequences among different strains showed  
394 that strains harboring E/I modules from the same family had 100% immunity identity (Table  
395 S4). Given the diversity of E/I modules in this cluster when comparing all strains, the  
396 complete identity of immunity proteins from the same family could indicate recent  
397 acquisition by horizontal gene transfer. Furthermore, L6G and SL6Y (clade C) are the only  
398 strains that also harbor one or several orphan immunity loci after the E/I module in this large  
399 T6SS cluster (Fig. 3).

400 These orphan immunity loci are distinct in their type when compared with the current  
401 resident E/I modules. When we searched the PATRIC translated nucleotide sequence  
402 database (Wattam *et al.*, 2017) using the protein sequence from these orphan loci as the  
403 query, we noticed that these genes are only found as orphan loci in other genomes. The only  
404 exception was the second orphan locus in strain SL6Y, which encodes a G-type immunity  
405 protein (marked by “#” in Fig. 3). The predicted protein showed 98.4% identity to true  
406 immunity proteins (e.g., those encoded directly adjacent to an effector gene) from several *V.*  
407 *cholerae* strains. Among those was strain 2633-78, an O1 CTX-negative isolate collected  
408 from sewage in Brazil in 1978. Interestingly, this strain was experimentally tested in a  
409 previous study, where it was shown to have an active T6SS (Bernardy *et al.*, 2016).

410 The auxiliary cluster 1 contains the structural or evolved (e.g., encoding C-terminal  
411 ACD) *vgrG1* gene, as mentioned above (Figs. 2 and 3). In addition, in the case of pandemic  
412 *V. cholerae*, this cluster harbors an A-type E/I module encoding the lipase effector TseL with  
413 anti-bacterial and anti-eukaryotic activity (Zheng *et al.*, 2011; Dong *et al.*, 2013; Russell *et*  
414 *al.*, 2013) followed by a C-type orphan immunity gene (Kirchberger *et al.*, 2017).  
415 Interestingly, all of the 15 environmental strains harbor C-type E/I modules as part of this

416 auxiliary cluster 1, even though there is considerable polymorphism in the effector and  
417 immunity proteins (Fig. 3 and Table S5). C-type effectors have a predicted alpha/beta  
418 hydrolase domain (DUF2235), which has been previously associated with T6SS  
419 phospholipases from *E. coli* and *Pseudomonas aeruginosa* (Russell *et al.*, 2013; Flaugnatti *et*  
420 *al.*, 2016; Crisan *et al.*, 2019). Furthermore, with the exception of strains W10G (clade A)  
421 and SO5Y (clade B), all environmental isolates also carry between two and five orphan  
422 immunity loci downstream of the E/I pair (Fig. 3). Considering the wide variety of E/I types  
423 in the large cluster as well as in auxiliary cluster 2 (see below), the apparent conservation of  
424 C-type E/I modules in the auxiliary cluster 1 of these strains, in addition to the many C-type  
425 orphan loci (as also observed in the *in silico* study by Kirchberger *et al.* 2017) is quite  
426 intriguing and supports the idea that the C-type orphan immunity gene in the pandemic  
427 strains might be a remnant of a previous C-type E/I module of the strains' progenitor.

428         In pandemic *V. cholerae*, the auxiliary cluster 2 carries an A-type E/I module where  
429 the VasX effector is a pore-forming toxin (Miyata *et al.*, 2011; Miyata *et al.*, 2013; Russell *et*  
430 *al.*, 2014). Our comparative genomic analyses showed that several of the environmental  
431 isolates likewise encode VasX-like effectors (A-type) at the same locus (Fig. 3 and Tables S3  
432 and S6), while other strains carry D- and E-type E/I modules. While D-type effectors have  
433 been predicted to foster peptidoglycan degradation, E-type effectors are predicted to form  
434 pores, like VasX (Unterweger *et al.*, 2014). We therefore reasoned that the residual ACD-  
435 independent T6SS-dependent anti-amoebal impact observed for strain SA10G (clade D)  
436 might be caused by this E-type effector from auxiliary cluster 2, especially as the latter is  
437 missing from clade C strain SL6Y in which removal of the ACD from VgrG1 was almost  
438 equivalent to a complete T6SS inactivation (Fig. 2G). Interestingly, our analyses suggest that  
439 these E-type effectors also contain a common peptidoglycan-binding domain (e.g., an N-  
440 terminal Lysin Motif; Buist *et al.*, 2008), which might render them bifunctional against

441 bacteria and eukaryotes (Fig. 3 and Table S3). Future work will address the exact  
442 characteristics of the putative E/I modules in more detail.

443

444 **Competition among environmental strains occurs in the presence of nonidentical E/I**  
445 **modules**

446 Previous studies showed that a plethora of T6SS-transported effectors have active anti-  
447 bacterial purposes and that cognate immunity proteins are required to protect the producer or  
448 its siblings from intoxication (Dong *et al.*, 2013; Durand *et al.*, 2014; Russell *et al.*, 2014;  
449 Unterweger *et al.*, 2014). Strains with matching E/I modules could therefore coexist in the  
450 same environment (Unterweger *et al.*, 2014), while competitive strains might clear a niche  
451 and propagate inside this niche in a clonal manner (McNally *et al.*, 2017; Speare *et al.*, 2018).  
452 Importantly, as these E/I modules seem to move horizontally in an as yet uncharacterized  
453 manner (Unterweger *et al.*, 2014; Salomon *et al.*, 2015), the level of compatibility between  
454 strains will not follow their phylogenetic relatedness. We therefore sought to experimentally  
455 probe the strains' compatibility or competitiveness within this collection of environmental  
456 isolates. Indeed, while we scored T6SS activity against a laboratory strain of *E. coli* (see Fig.  
457 2), we wondered how the *V. cholerae* strains would behave when exposed to each other.  
458 Consistent with the fact that the E/I modules carried by the environmental strains are  
459 considerably different from those of pandemic *V. cholerae* (Fig. 3 and Table S3), we  
460 experimentally demonstrated that these bacteria efficiently outcompeted the T6SS-silent  
461 pandemic strain A1552 (Fig. 4A). Next, we tested interbacterial competition between the  
462 clade-representative strains in an assay in which the prey strains had their T6SS inactivated.  
463 As shown in Figure 4B, reciprocal killing of the T6SS-positive parental strains occurred and  
464 only kin strains were immune to the toxic assaults. However, as the E/I module types seemed  
465 more similar within clades than across clades, we extended our analyses and tested all

466 pairwise combinations (this time, with both partners T6SS positive). The underlying rationale  
467 was that previous studies had identified different types of E/I modules *in silico* (Unterweger  
468 *et al.*, 2014; Kirchberger *et al.*, 2017; Crisan *et al.*, 2019) but most pairwise competition  
469 assays were primarily linked to patient isolates and not to a larger collection of environmental  
470 isolates. Indeed, as described above and shown in Figure 3, our *in silico* prediction showed  
471 that strains within clades often contained similar E/I module types (Tables S4 to S6), even  
472 though the amino acid identity threshold for this categorization is rather low (30% as  
473 previously defined; Unterweger *et al.*, 2014; Kirchberger *et al.*, 2017).

474 As shown in Figure 4, we observed interesting and complex phenotypes in these  
475 extensive pairwise killing experiments. For instance, strains W6G and W7G from clade C  
476 were fully protected against each other's attacks (Fig. 4 panels M and N). This finding is  
477 consistent with the 100% identity of all three T6SS clusters, including the orphan genes from  
478 aux cluster 1 (Tables S4 to S6), and their overall near clonality as described above. Clade D  
479 strains have the same E/I module types in all T6SS clusters. However, upon closer inspection  
480 of their E/I protein sequences, we can observe a 100% sequence identity among the three  
481 strains only in the large and aux 1 cluster-encoded proteins. For the aux 2 cluster, the  
482 encoded E/I proteins from strains E7G and SA7G are 100% identical, while the E/I pair  
483 carried by strain SA10G has only 95%/73% identity when compared with the other two  
484 strains' E/I pair (Tables S4 to S6). Consequently, and as shown in Figure 4 (panel O to Q),  
485 strains E7G and SA7G are fully compatible with each other, while strain SA10G can kill and  
486 be killed by the other two strains. We therefore concluded that the identity level in only one  
487 of the T6SS cluster-encoded immunity proteins causes the competitiveness among these  
488 strains.

489 Surprisingly, clade B strains SA5Y and SL4G have 100% identity in all three T6SS  
490 cluster-encoded immunity proteins (Tables S4 to S6) but are still able to kill each other with

491 considerable efficiency (Fig. 4, panels E and F). Why this is the case is currently unclear.  
492 However, we speculate that expression or immunity protein production might be impaired in  
493 those strains or that additional T6SS E/I modules are hidden in the strains' genomes, which  
494 were not easily identifiable based on a lack of the hallmark genes *paar*, *hcp* and *vgrG* in their  
495 vicinity.

496 Clade A strain W10G carries pandemic-like A-type E/I modules in the large and aux2  
497 clusters (Fig. 3). Interestingly, this strain can kill many of the other environmental strains  
498 remarkably well, such as clade B strains SA5Y, SL4G and SL5Y, and clade C strains SL6Y  
499 and SP6G. Notably, the T6SS active toxigenic strain V52 (which harbors A-type E/I modules  
500 in all T6SS clusters) was previously shown to outcompete strains carrying different  
501 combinations of E/I modules (Unterweger *et al.*, 2014). Indeed, the AAA (A-type in all  
502 clusters) E/I modules is conserved in pandemic *V. cholerae*, even in those strains that caused  
503 former pandemics (e.g., 6<sup>th</sup> pandemic O1 classical strains), as well as in non-pandemic but  
504 toxigenic isolates. It was therefore speculated that this combination might be advantageous in  
505 a disease context (Unterweger *et al.*, 2014). Clade B strain SA3G also contains A-type E/I  
506 modules in the large and aux 2 clusters, but it does not kill other strains at the same level as  
507 strain W10G. However, as noted above, this strain is even less efficient against laboratory *E.*  
508 *coli* prey strains (Fig. 2A), which could mask its full effector toxicity potential.

509 Finally, a very interesting pairwise comparison is that of clade C strains SP7G and  
510 L6G. While L6G as a prey is very efficiently eliminated by strain SP7G (Fig. 4, panel I),  
511 SP7G prey is resistant to L6G intoxication (Fig. 4, panel L). These strains contain E/I sets of  
512 different families in the large cluster and show 78% and 99.7% identity in the immunity  
513 proteins encoded in aux cluster 1 and 2, respectively. Based on these differences, we would  
514 expect that these strains fully compete with each other; however, killing only occurs with  
515 SP7G as the predator. We therefore speculate that the large cluster-encoded K-type effector

516 domains of strain L6G's evolved VgrG3 as well as SP7G's noncanonical structural VgrG3  
517 and its adjacently encoded putative effector protein might not be functional peptidoglycan  
518 destruction enzymes and therefore not necessarily active in interbacterial competition. Why a  
519 low level of protein identity in the aux cluster 2-encoded immunity protein is sufficient to  
520 protect strain SP7G from L6G assaults is currently unclear. However, it is tempting to  
521 speculate that the *vice versa* interaction leads to L6G killing due to the additional aux cluster  
522 6 that is carried by strain SP7G. Further work is therefore necessary in order to delve deeper  
523 into these observed phenotypes.

524 Overall, closer inspection of all of the pairwise killing data attests to the complexity  
525 behind the T6SS compatibility code. As mentioned previously, even though some strains  
526 might harbor the same E/I families in the T6SS clusters, pairwise comparisons of these  
527 proteins shows that quite frequently their identity is not 100% (Tables S4 to S6), which  
528 appears to be necessary to allow coexistence (also observed in Speare *et al.*, 2018). Our data  
529 therefore support what Unterweger and colleagues (Unterweger *et al.*, 2014) initially  
530 speculated, namely, that the compatibility between strains seems to follow the level of  
531 polymorphism of their immunity proteins and that diversity in only one cluster-encoded  
532 protein is sufficient to drive competition.

533

## 534 **Conclusion**

535 In this study, we investigated two minor virulence factors, the pore forming hemolysin and  
536 the T6SS, in a set of fifteen environmental *V. cholerae* strains. We assessed the relevance of  
537 these molecular weapons as defense mechanisms against amoebal predation (hemolysin and  
538 T6SS) and in the context of bacterial warfare (T6SS only). We showed that all of these  
539 environmental isolates possess a constitutively active T6SS and are able to use the machinery  
540 as a bacterial killing device. In contrast, only a subset of these strains was able to efficiently

541 suppress grazing by *D. discoideum* amoebae, a phenotype that was dependent on the  
542 eukaryote-specific ACD of the evolved VgrG1 T6SS effector. Careful *in silico* identification  
543 unveiled an extensive T6SS repertoire of E/I pairs and orphan immunity loci. Consistent with  
544 this finding, we observed extensive interbacterial competition under pairwise coculture  
545 conditions whereby mutual compatibility was rarely achieved. Importantly, our study also  
546 confirmed that both molecular weapons, the T6SS and the hemolysin toxin, are constitutively  
547 active in the environmental isolates in contrast to their tight regulation in the well-studied  
548 pandemic patient isolates. Future work is therefore required to decipher how this differential  
549 production pattern is achieved in pandemic versus non-pandemic strains and whether this  
550 tight regulatory control might provide specific benefits to the former strains.

551

## 552 **Experimental procedures**

### 553 **Bacterial strains and growth conditions**

554 The bacterial strains (*V. cholerae*, *E. coli* and *K. pneumoniae*) used in this study are listed in  
555 Table S1. Unless otherwise stated, all strains were grown aerobically in Lysogeny broth (LB;  
556 10 g/L of tryptone, 5 g/L of yeast extract, 10 g/L of sodium chloride; Carl Roth) or on LB  
557 agar plates at 30°C. Half-concentrated defined artificial seawater medium (0.5×DASW)  
558 containing HEPES and vitamins (Meibom *et al.*, 2005) was used for growth on chitinous  
559 surfaces for strain construction based on chitin-induced natural transformation (see below).

560 *D. discoideum* amoebae (strain Ax2 Ka) were cultured in HL5 medium supplemented  
561 with glucose (Formedium, UK). For amoebal grazing assays (e.g., plaque formation assays;  
562 see below), SM/5 medium (final concentrations: 2 g/L of glucose, 2 g/L of bacto peptone, 2  
563 g/L of yeast extract, 0.2 g/L of MgSO<sub>4</sub> 7H<sub>2</sub>O, 1.9 g/L of KH<sub>2</sub>PO<sub>4</sub>, 1 g/L of K<sub>2</sub>HPO<sub>4</sub>; pH 6.4),  
564 was mixed with 2% agar to prepare SM/5 plates (20 mL/plate) (Sussman, 1987). CaCl<sub>2</sub> (50  
565 μM)-supplemented Sørensen's buffer (8 g /4 L of KH<sub>2</sub>PO<sub>4</sub>, 1.16 g /4 L of Na<sub>2</sub>HPO<sub>4</sub>; pH 6;

566 Gerisch *et al.*, 1967) was used as the washing and resuspension buffer for the amoebae and  
567 the bacteria that were used in the plaque formation assay.

568 The following antibiotics were added if required at the given concentration:  
569 kanamycin (75 µg/ml), rifampicin (100 µg/ml), streptomycin (100 µg/ml) and  
570 chloramphenicol (2.5 µg/ml).

571

## 572 **Genetic engineering**

573 *V. cholerae* strains were genetically modified using chitin-induced transformation as  
574 previously described (Marvig 2010; Silva and Blokesch, 2010; Blokesch, 2012; Borgeaud  
575 and Blokesch, 2013). This method relies on natural transformation triggered by growth on  
576 chitin followed by the addition of a PCR fragment that carried the desired genetic change. To  
577 achieve higher numbers of transformants, the protocol was slightly modified. The PCR  
578 fragments were added twice (24h and 36h after bacterial inoculation on the chitin flakes) and  
579 cells were enriched in 2×YT medium (Carl Roth) before selective plating. PCR  
580 amplifications were conducted using Pwo (Roche) and GoTaq (Promega) polymerases  
581 according to the suppliers' recommendations. Following initial screening by PCR (using  
582 bacterial cells as the templates), genetically engineered loci were verified by Sanger  
583 sequencing (Microsynth, Switzerland).

584 The rifampicin-sensitive *V. cholerae* strain A1552-Rif<sup>S</sup> was generated by a  
585 combination of natural cotransformation (Dalia *et al.*, 2014) and our previously described  
586 counterselectable Trans2 approach (Van der Henst *et al.*, 2018). To this end, a 4kb PCR  
587 fragment was amplified, harboring a mutation, which restored the native *rpoB*-encoded  
588 protein (F531S substitution) from its mutated version in the parental strain A1552  
589 (RpoB[S531F]; Matthey *et al.*, 2018). *V. cholerae* A1552 was then cotransformed with this  
590 fragment and another 3,924 bp fragment containing flanking regions matching *lacZ* and two



591 selection markers (*aph* and *pheS\**; Table S1). Transformants were selected on kanamycin-  
592 containing agar plates and the lost rifampicin resistance was scored based on replica plating  
593 on plates +/- rifampicin using a velvet cloth. A second round of natural transformation  
594 followed to restore the *lacZ* gene by adding a WT *lacZ* PCR fragment to chitin-grown cells  
595 followed by a counter selection of the *pheS\** allele on 4-chloro-phenylalanine (20mM)-  
596 containing agar plates as previously described (Van der Henst *et al.*, 2018). To confirm the  
597 restoration of native *rpoB*, genomic DNA of A1552 Rif<sup>S</sup> was isolated and the PCR-amplified  
598 *rpoB* gene was Sanger-sequenced.

599

#### 600 **Amoebal grazing assay**

601 To determine the predatory capacity of *D. discoideum* on bacterial lawns of *V. cholerae*,  
602 plaque formation was scored following a previously described protocol (Pukatzki *et al.*,  
603 2006) with minor modifications. Briefly, bacteria were cultured overnight in LB medium at  
604 30°C and harvested by centrifugation. The cell pellet was washed and resuspended in SorC  
605 buffer (Gerisch *et al.*, 1967), and then diluted with SorC to reach an optical density at 600 nm  
606 (OD<sub>600</sub>) of 5.5 in a final volume of 400 µL. Cultured *D. discoideum* amoebae (in HL5 with  
607 glucose; Formedium, UK) were detached from culture dishes using cell scraper (SPL Life  
608 Sciences) and collected by centrifugation (3 min 1,000 rcf), resuspended in SorC buffer, and  
609 enumerated in a KOVA counting chamber (KOVA International, USA). The amoebal  
610 concentration was adjusted to  $2 \times 10^4$  cells/ mL and 20 µL of this suspension (corresponding  
611 to ~400 amoebal cells) was mixed with the 400 µL of bacterial suspension. The mixture was  
612 gently spread on two parallel SM/5 plates using a plastic rake (VWR), resulting in technical  
613 replicates. The plates were wrapped in aluminum foil and incubated at 24°C for 5 days. After  
614 this incubation period, *D. discoideum* plaque numbers were enumerated. As a positive  
615 control, we included a frequently used nonencapsulated *Klebsiella* strain (Benghezal *et al.*,

616 2006) for which the resulting plaque numbers were set to 100%. Three biologically  
617 independent experiments were performed. The individual experimental data points (mean of  
618 technical replicates) as well as the overall average of the independent experiments (+/-  
619 standard deviation) are shown in each graph. A two-tailed Student's *t*-test was performed to  
620 determine statistical significance.

621

### 622 **Hemolysin activity**

623 The hemolytic activity of *V. cholerae* was assayed using trypticase soy agar containing 5%  
624 sheep blood (BD, Heidelberg, Germany). To do so, the respective overnight cultures were  
625 spotted (2  $\mu$ L) onto the plates and incubated at 30°C for 24 h, after which pictures of the  
626 plates were taken.

627

### 628 **Interbacterial killing assays**

629 Bacterial killing was assessed following a previously established assay with minor  
630 modifications (Borgeaud *et al.*, 2015). The prey cells (*E. coli* or *V. cholerae*, as indicated)  
631 and the respective predator bacteria were mixed at a ratio of 1:10 and spotted onto paper  
632 filters on prewarmed LB agar plates. After 4 h of incubation at 37°C, the bacteria were  
633 resuspended, serially diluted, and spotted onto antibiotic-containing (rifampicin or  
634 streptomycin) LB agar plates to enumerate the colony-forming units (shown as CFU/ml). The  
635 majority of these killing experiments were performed using exponentially growing *V.*  
636 *cholerae* (OD<sub>600</sub> ~1). For the pairwise killing experiments of all environmental strains,  
637 OD<sub>600</sub>-adjusted overnight cultures were used, which resulted in biologically similar outcomes  
638 to the samples derived from exponentially growing cultures. Statistically significant  
639 differences were determined on log-transformed data (Keene, 1995) by a two-tailed Student's

640 *t*-test of three biologically independent replicates. If no prey bacteria were recovered, the  
641 value was set to the detection limit to allow for statistical analysis.

642

### 643 **SDS-PAGE and western blotting**

644 To check the production of the Hcp protein, cell lysates were prepared as described  
645 previously (Metzger *et al.*, 2016). In brief, exponentially growing bacteria (~3 hours of  
646 growth after a 1:100 back dilution from overnight cultures) were pelleted and then  
647 resuspended in Laemmli buffer, adjusting for the total number of bacteria according to the  
648 cultures' OD<sub>600</sub> values. To check for T6SS-secreted Hcp, 1.5 ml of the culture supernatant  
649 was filter sterilized (0.2- $\mu$ m filter; VWR) and the proteins were precipitated using  
650 trichloroacetic acid (TCA). The precipitated proteins were washed with acetone before being  
651 resuspended in 30  $\mu$ L of Laemmli buffer. All samples were heated at 95°C for 15 min.

652 Proteins were separated by sodium dodecyl sulfate (SDS)-polyacrylamide gel  
653 electrophoresis (PAGE) using 15% gels and then western blotted as previously described (Lo  
654 Scudato and Blokesch, 2012). Primary antibodies against Hcp (Eurogentec; Metzger *et al.*,  
655 2016) were used at 1:5,000 dilution while anti-Sigma70-HRP antibodies (BioLegend, USA  
656 distributed via Brunschwig, Switzerland) were diluted 1:10,000 and served as a loading  
657 control. Goat anti-rabbit horseradish peroxidase (HRP) (diluted at 1:20,000; Sigma-Aldrich,  
658 Switzerland) was used as the secondary antibody against the anti-Hcp primary antibody.  
659 Lumi-Light<sup>PLUS</sup> western blotting substrate (Roche, Switzerland) served as the HRP substrate.  
660 The signals were detected using a ChemiDoc XRS+ station (BioRad).

661

### 662 **Preparation of genomic DNA for whole-genome sequencing**

663 Genomic DNA (gDNA) was purified from 2 ml of an overnight culture of the respective  
664 strain. DNA extraction was performed using 100/G Genomic-tips together with a Genomic

665 DNA buffer set as described in the manufacturer's instructions (Qiagen). After precipitation,  
666 the DNA samples were washed twice with cold 70% ethanol and dissolved in Tris buffer (10  
667 mM Tris-HCl, pH 8.0).

668

### 669 **Long-read PacBio genome sequencing**

670 Sample preparation and genome sequencing was performed by the Genomic Technology  
671 Facility of the University of Lausanne (Switzerland) using standard protocols. Briefly, DNA  
672 samples were sheared in Covaris g-TUBEs to obtain fragments with a mean length of 20 kb.  
673 The sheared DNA was used to prepare each library with the PacBio SMRTbell template prep  
674 kit 1 (Pacific Biosciences) according to the manufacturer's recommendations. The resulting  
675 library was size selected on a BluePippin system (Sage Science, Inc.) for molecules larger  
676 than 15 kb, which excluded smaller plasmids. Each library was sequenced on one single-  
677 molecule real-time (SMRT) cell with P6/C4 chemistry and MagBeads on a PacBio RS II  
678 system at a movie length of 360 min. Genome assembly was performed using the protocol  
679 RS\_HGAP\_Assembly.3 in SMRT Pipe 2.3.0, and circularization of the genomes was  
680 achieved using the Minimus assembler of the AMOS software package 3.1.0 using default  
681 parameters (Sommer *et al.*, 2007). The assembled genomes were initially annotated using  
682 Prokka 1.12 (Seemann, 2014) but due to several incompatibilities with the NCBI database,  
683 they were reannotated with their own pipeline (PGAP annotation) during NCBI submission.  
684 The genomic data and NCBI accession numbers are summarized in Table S2.

685 Sequencing artifacts were observed for two genomic regions of strain W10G (clade  
686 A), leading to frameshifted putative effector genes. Briefly, for aux cluster 1, the effector  
687 gene was split into two ORFs (locus tags VC-W10G\_01483 and VC-W10G\_01482 in  
688 CP053794), due to the insertion of a C in position 321 of the first ORF, which led to a  
689 frameshift and consequently to an early stop codon at position 351. Similarly, in aux cluster

690 2, the putative effector gene was also split into two ORFs (locus tags W10G\_02844 and  
691 W10G\_02845 in CP053795) due to the insertion of a C in position 890, which likewise  
692 caused a frameshift followed by early termination. Both of these regions were Sanger  
693 sequenced after PCR-amplification using the same genomic DNA samples as templates that  
694 were initially used for PacBio library preparation, which confirmed that the additional C  
695 bases were in both cases a sequencing artifact and the genes were properly maintained in  
696 strain W10G (as indicated in Fig. 3).

697

### 698 **Characterization of E/I modules from environmental strains**

699 T6SS clusters of the environmental strains were identified by searching the Prokka-annotated  
700 genomes for conserved genes, such as *paar*, *vgrG* and *hcp*, as well as according to their  
701 location when aligned to the genome of the pandemic strain A1552 (Matthey *et al.*, 2018).  
702 All identified putative effectors were compared by BLAST against the NCBI database to  
703 identify conserved domains. Additional characterization was made based on the previous  
704 literature (Unterweger *et al.*, 2014; Kirchberger *et al.*, 2017). Furthermore, all E/I modules  
705 and orphan immunity loci were classified for their family type. Proteins with a sequence of  
706 less than 30% identity were considered as distinct incompatible types, as previously  
707 described (Unterweger *et al.*, 2014; Kirchberger *et al.*, 2017). For VgrG3 proteins, the typing  
708 was only based on the effector portion of the protein (Unterweger *et al.*, 2014). To determine  
709 this part of the protein, the full VgrG3 sequence from all strains was aligned. The conserved  
710 region corresponding to the VgrG part of the protein was subsequently removed, which left  
711 only the variable C-terminal effector domain. This part was then used for typing and pairwise  
712 comparisons. The putative orphan immunity proteins were queried against a translated  
713 nucleotide database (PATRIC; Wattam *et al.*, 2017) to identify homologous *bona fide*  
714 immunity proteins encoded adjacent to an effector gene in the other T6SS clusters.

715

716 **Data availability**

717 PacBio raw reads of the 14 whole-genome sequenced strains have been deposited in NCBI's  
718 Sequence Read Archive (SRA) under Bioproject accession number PRJNA633476. Details  
719 on the SRA accession numbers, BioSamples, and individual accession numbers of the *de*  
720 *novo* assembled and circularized genomes are provided in Table S2.

721

722 **Acknowledgments**

723 The authors acknowledge Sandrine Stutzmann for technical assistance, A. Boehm for sharing  
724 the published environmental *V. cholerae* isolates, Lisa Metzger for provision of strain  
725 constructs, and Thierry Soldati for sharing the *D. discoideum* amoebae. We also thank  
726 Frédérique Le Roux and current and former members of the Blokesch group and of the  
727 Lausanne/Geneva amoeba club for fruitful discussions. The authors acknowledge the staff of  
728 the Lausanne Genomic Technologies Facility at the University of Lausanne for sample  
729 processing, sequencing, and genome assembly, the NCBI submission staff for help with data  
730 deposition, and Anne-Catherine Portmann and Ivan Mateus for preliminary analysis of the  
731 genome data. We also note that the purchase of the Pacific Biosciences RS II instrument at  
732 the University of Lausanne was partially supported by the Loterie Romande through the  
733 Fondation pour la Recherche en Médecine Génétique. This work was supported by the Swiss  
734 National Science Foundation (310030\_185022), the Novartis Foundation for medical-  
735 biological Research (#18C178), and a consolidator grant by the European Research Council  
736 (724630). MB is a Howard Hughes Medical Institute (HHMI) International Research Scholar  
737 (grant 55008726).

738 **References**

- 739 Aldova, E., Laznickova, K., Stepankova, E., and Lietava, J. (1968) Isolation of  
740 nonagglutinable vibrios from an enteritis outbreak in Czechoslovakia. *J Infect Dis* **118**:  
741 25–31.
- 742 Ali, M., Nelson, A.R., Lopez, A.L., and Sack, D.A. (2015) Updated global burden of cholera  
743 in endemic countries. *PLoS Negl Trop Dis* **9**: 1–13.
- 744 Altindis, E., Dong, T., Catalano, C., and Mekalanos, J.J. (2015) Secretome analysis of *Vibrio*  
745 *cholerae* type VI secretion system reveals a new effector-immunity pair. *mBio* **6**:  
746 e00075-15.
- 747 Basler, M., Pilhofer, M., Henderson, G.P., Jensen, G.J., and Mekalanos, J.J. (2012) Type VI  
748 secretion requires a dynamic contractile phage tail-like structure. *Nature* **483**: 182–186.
- 749 Benghezal, M., Fauvarque, M.O., Tournebize, R., Froquet, R., Marchetti, A., Bergeret, E., *et*  
750 *al.* (2006) Specific host genes required for the killing of *Klebsiella* bacteria by  
751 phagocytes. *Cell Microbiol* **8**: 139–148.
- 752 Bernardy, E.E., Turnsek, M.A., Wilson, S.K., Tarr, C.L., and Hammer, B.K. (2016) Diversity  
753 of clinical and environmental isolates of *Vibrio cholerae* in natural transformation and  
754 contact-dependent bacterial killing indicative of type VI secretion system activity. *Appl*  
755 *Environ Microbiol* **82**: 2833–2842.
- 756 Bishop-Lilly, K., Johnson, S., Verratti, K., Truong, L., Amy, K., Joy, A., *et al.* (2014)  
757 Genome sequencing of 15 clinical isolates, including 13 non-O1/non-O139 serogroup  
758 strains. *Genome Announc* **2**: e00893-14.
- 759 Blokesch, M. (2012) TransFLP - A method to genetically modify *Vibrio cholerae* based on  
760 natural transformation and FLP-recombination. *JoVE*: e3761.
- 761 Borgeaud, S. and Blokesch, M. (2013) Overexpression of the *tcp* gene cluster using the T7  
762 RNA polymerase/promoter system and natural transformation-mediated genetic

- 763 engineering of *Vibrio cholerae*. *PLoS One* **8**: e53952.
- 764 Borgeaud, S., Metzger, L.C., Scignari, T., and Blokesch, M. (2015) The type VI secretion  
765 system of *Vibrio cholerae* fosters horizontal gene transfer. *Science* **347**: 63–67.
- 766 Boyd, E.F. and Waldor, M.K. (2002) Evolutionary and functional analyses of variants of the  
767 toxin-coregulated pilus protein TcpA from toxigenic *Vibrio cholerae* non-O1/nonO139  
768 serogroup isolates. *Microbiology* **148**: 1655–1666.
- 769 Bröms, J.E., Ishikawa, T., Wai, S.N., and Sjöstedt, A. (2013) A functional VipA-VipB  
770 interaction is required for the type VI secretion system activity of *Vibrio cholerae* O1  
771 strain A1552. *BMC Microbiol* **13**: 96.
- 772 Brooks, T.M., Unterweger, D., Bachmann, V., Kostiuk, B., and Pukatzki, S. (2013) Lytic  
773 activity of the *Vibrio cholerae* type VI secretion toxin VgrG-3 is inhibited by the  
774 antitoxin TsaB. *J Biol Chem* **288**: 7618–7625.
- 775 Buist, G., Steen, A., Kok, J., and Kuipers, O.P. (2008) LysM, a widely distributed protein  
776 motif for binding to (peptido)glycans. *Mol Microbiol* **68**: 838–847.
- 777 Cherrak, Y., Flaugnatti, N., Durand, E., Journet, L., and Cascales, E. (2019) Structure and  
778 regulation of the type VI secretion system. *Microbiol Spectr* **7**:PSIB-0031-2019.
- 779 Chou, S., Bui, N.K., Russell, A.B., Lexa, K.W., Gardiner, T.E., LeRoux, M., *et al.* (2012)  
780 Structure of a peptidoglycan amidase effector targeted to Gram-negative bacteria by the  
781 type VI secretion system. *Cell Rep* **1**: 656–664.
- 782 Chun, J., Grim, C.J., Hasan, N.A., Lee, J.H., Choi, S.Y., Haley, B.J., *et al.* (2009)  
783 Comparative genomics reveals mechanism for short-term and long-term clonal  
784 transitions in pandemic *Vibrio cholerae*. *Proc Natl Acad Sci USA* **106**: 15442–15447.
- 785 Cianfanelli, F.R., Monlezun, L., and Coulthurst, S.J. (2016) Aim, load, fire: the type VI  
786 secretion system, a bacterial nanoweapon. *Trends Microbiol* **24**: 51–62.
- 787 Clemens, J.D., Nair, G.B., Ahmed, T., Qadri, F., and Holmgren, J. (2017) Cholera. *Lancet*



- 788           **390**: 1539–1549.
- 789   Cottingham, K.L., Chiavelli, D.A., and Taylor, R.K. (2003) Environmental microbe and  
790       human pathogen: the ecology and microbiology of *Vibrio cholerae*. *Front Ecol*  
791       *Environm* **1**: 80–86.
- 792   Crisan, C. V., Chande, A.T., Williams, K., Raghuram, V., Rishishwar, L., Steinbach, G., *et*  
793       *al.* (2019) Analysis of *Vibrio cholerae* genomes identifies new type VI secretion system  
794       gene clusters. *Genome Biol* **20**: 163.
- 795   Crisan, C. V and Hammer, B.K. (2020) The *Vibrio cholerae* type VI secretion system: toxins,  
796       regulators and consequences. *Environm Microb* (online ahead of print).
- 797   Dalia, A.B., McDonough, E.K., and Camilli, A. (2014) Multiplex genome editing by natural  
798       transformation. *Proc Natl Acad Sci USA* **111**: 8937–8942.
- 799   Deshayes, S., Daurel, C., Cattoir, V., Parienti, J.J., Quilici, M.L., and de La Blanchardière, A.  
800       (2015) Non-O1, non-O139 *Vibrio cholerae* bacteraemia: case report and literature  
801       review. *Springerplus* **4**: 575.
- 802   Domman, D., Quilici, M.-L., Dorman, M.J., Njamkepo, E., Mutreja, A., Mather, A.E., *et al.*  
803       (2017) Integrated view of *Vibrio cholerae* in the Americas. *Science* **358**: 789–793.
- 804   Dong, T.G., Ho, B.T., Yoder-Himes, D.R., and Mekalanos, J.J. (2013) Identification of  
805       T6SS-dependent effector and immunity proteins by Tn-seq in *Vibrio cholerae*. *Proc*  
806       *Natl Acad Sci USA* **110**: 2623–2628.
- 807   Durand, E., Cambillau, C., Cascales, E., and Journet, L. (2014) VgrG, Tae, Tle, and beyond:  
808       The versatile arsenal of type VI secretion effectors. *Trends Microbiol* **22**: 498–507.
- 809   Dziejman, M., Balon, E., Boyd, D., Fraser, C.M., Heidelberg, J.F., and Mekalanos, J.J.  
810       (2002) Comparative genomic analysis of *Vibrio cholerae*: Genes that correlate with  
811       cholera endemic and pandemic disease. *Proc Natl Acad Sci USA* **99**: 1556–1561.
- 812   Dziejman, M., Serruto, D., Tam, V.C., Sturtevant, D., Diraphat, P., Faruque, S.M., *et al.*

- 813 (2005) Genomic characterization of non-O1, non-O139 *Vibrio cholerae* reveals genes  
814 for a type III secretion system. *Proc Natl Acad Sci* **102**: 3465–3470.
- 815 Faruque, S.M., Albert, M.J., and Mekalanos, J.J. (1998) Epidemiology, genetics, and ecology  
816 of toxigenic *Vibrio cholerae*. *Microbiol Mol Biol Rev* **62**: 1301–14.
- 817 Faruque, S.M., Chowdhury, N., Kamruzzaman, M., Dziejman, M., Rahman, M.H., Sack,  
818 D.A., *et al.* (2004) Genetic diversity and virulence potential of environmental *Vibrio*  
819 *cholerae* population in a cholera-endemic area . *Proc Natl Acad Sci USA* **101**: 2123–  
820 2128.
- 821 Faruque, S.M., Kamruzzaman, M., Meraj, I.M., Chowdhury, N., Nair, G.B., Sack, R.B., *et al.*  
822 (2003) Pathogenic potential of environmental *Vibrio cholerae* strains carrying genetic  
823 variants of the toxin-coregulated pilus pathogenicity island. *Infect Immun* **71**: 1020–  
824 1025.
- 825 Flaugnatti, N., Le, T.T.H., Canaan, S., Aschtgen, M.S., Nguyen, V.S., Blangy, S., *et al.*  
826 (2016) A phospholipase A1 antibacterial type VI secretion effector interacts directly  
827 with the C-terminal domain of the VgrG spike protein for delivery. *Mol Microbiol* **99**:  
828 1099–1118.
- 829 Flaugnatti, N., Rapisarda, C., Rey, M., Beauvois, S.G., Nguyen, V.A., Canaan, S., *et al.*  
830 (2020) Structural basis for loading and inhibition of a bacterial T6SS phospholipase  
831 effector by the VgrG spike. *EMBO J* **39**: e104129.
- 832 Galán, J.E. and Waksman, G. (2018) Protein-injection machines in bacteria. *Cell* **172**: 1306–  
833 1318.
- 834 Gennari, M., Ghidini, V., Caburlotto, G., and Lleo, M.M. (2012) Virulence genes and  
835 pathogenicity islands in environmental *Vibrio* strains nonpathogenic to humans. *FEMS*  
836 *Microbiol Ecol* **82**: 563–573.
- 837 Gerisch, G; Lüderitz, O; Ruschmann, E. (1967) Antikörper fördern die Phagozytose von

- 838           Bakterien durch Amöben. *Zsch Naturforsch* **22b**: 109.
- 839   Granato, E.T., Meiller-Legrand, T.A., and Foster, K.R. (2019) The evolution and ecology of  
840           bacterial warfare. *Curr Biol* **29**: R521–R537.
- 841   Hachani, A., Wood, T.E., and Filloux, A. (2016) Type VI secretion and anti-host effectors.  
842           *Curr Opin Microbiol* **29**: 81–93.
- 843   Harris, J.B., LaRocque, R.C., Qadri, F., Ryan, E.T., and Calderwood, S.B. (2012) Cholera.  
844           *Lancet* **379**: 2466–2476.
- 845   Hasan, N.A., Rezayat, T., Blatz, P.J., Choi, S.Y., Griffitt, K.J., Rashed, S.M., *et al.* (2015)  
846           Nontoxicogenic *Vibrio cholerae* non-O1/O139 isolate from a case of human gastroenteritis  
847           in the U.S. Gulf Coast. *J Clin Microbiol* **53**: 9–14.
- 848   Heidelberg, J.F., Elsen, J.A., Nelson, W.C., Clayton, R.A., Gwinn, M.L., Dodson, R.J., *et al.*  
849           (2000) DNA sequence of both chromosomes of the cholera pathogen *Vibrio cholerae*.  
850           *Nature* **406**: 477–483.
- 851   Van der Henst, C., Vanhove, A.S., Drebes Dörr, N.C., Stutzmann, S., Stoudmann, C., Clerc,  
852           S., *et al.* (2018) Molecular insights into *Vibrio cholerae*'s intra-amoebal host-pathogen  
853           interactions. *Nat Commun* **9**: 3420.
- 854   Hersch, S.J., Watanabe, N., Stietz, M.S., Manera, K., Kamal, F., Burkinshaw, B., *et al.*  
855           (2020) Envelope stress responses defend against type six secretion system attacks  
856           independently of immunity proteins. *Nat Microbiol* **5**: 706–714.
- 857   Hibbing, M.E., Fuqua, C., Parsek, M.R., and Peterson, S.B. (2010) Bacterial competition:  
858           surviving and thriving in the microbial jungle. *Nat Rev Microbiol* **8**: 15–25.
- 859   Ho, B.T., Dong, T.G., and Mekalanos, J.J. (2014) A view to a kill: the bacterial type VI  
860           secretion system. *Cell Host Microbe* **15**: 9–21.
- 861   Hood, R.D., Singh, P., Hsu, F.S., Güvener, T., Carl, M.A., Trinidad, R.R.S., *et al.* (2010) A  
862           type VI secretion system of *Pseudomonas aeruginosa* targets a toxin to bacteria. *Cell*

- 863 *Host Microbe* **7**: 25–37.
- 864 Ichinose, Y., Yamamoto, K., Nakasone, N., Tanabe, M.J., Takeda, T., Miwatani, T., and  
865 Iwanaga, M. (1987) Enterotoxicity of El Tor-like hemolysin of non-O1 *Vibrio cholerae*.  
866 *Infect Immun* **55**: 1090–1093.
- 867 Islam, M.S., Alam, M.J., and Neogi, P.K.B. (1992) Seasonality and toxigenicity of *Vibrio*  
868 *cholerae* non-O1 isolated from different components of pond ecosystems of Dhaka City,  
869 Bangladesh. *World J Microbiol Biotechnol* **8**: 160–163.
- 870 Jaskólska, M., Stutzmann, S., Stoudmann, C., and Blokesch, M. (2018) QstR-dependent  
871 regulation of natural competence and type VI secretion in *Vibrio cholerae*. *Nucleic*  
872 *Acids Res* **46**: 10619–10634.
- 873 Johnson, J.A., Salles, C.A., Panigrahi, P., Albert, M.J., Wright, A.C., Johnson, R.J., and  
874 Morris, J.G. (1994) *Vibrio cholerae* O139 synonym Bengal is closely related to *Vibrio*  
875 *cholerae* El Tor but has important differences. *Infect Immun* **62**: 2108–2110.
- 876 Keene, O.N. (1995) The log transformation is special. *Stat Med* **14**: 811–819.
- 877 Keymer, D.P., Miller, M.C., Schoolnik, G.K., and Boehm, A.B. (2007) Genomic and  
878 phenotypic diversity of coastal *Vibrio cholerae* strains is linked to environmental  
879 factors. *Appl Environ Microbiol* **73**: 3705–3714.
- 880 Kirchberger, P.C., Unterweger, D., Provenzano, D., Pukatzki, S., and Boucher, Y. (2017)  
881 Sequential displacement of type VI secretion system effector genes leads to evolution of  
882 diverse immunity gene arrays in *Vibrio cholerae*. *Sci Rep* **7**: 45133.
- 883 Kirn, T.J., Jude, B.A., and Taylor, R.K. (2005) A colonization factor links *Vibrio cholerae*  
884 environmental survival and human infection. *Nature* **438**: 863–866.
- 885 Kube, S., Kapitein, N., Zimniak, T., Herzog, F., Mogk, A., and Wendler, P. (2014) Structure  
886 of the VipA/B type VI secretion complex suggests a contraction-state-specific recycling  
887 mechanism. *Cell Rep* **8**: 20–30.

- 888 Labbate, M., Orata, F.D., Petty, N.K., Jayatilleke, N.D., King, W.L., Kirchberger, P.C., *et al.*  
889 (2016) A genomic island in *Vibrio cholerae* with VPI-1 site-specific recombination  
890 characteristics contains CRISPR-Cas and type VI secretion modules. *Sci Rep* **6**: 36891.
- 891 Liang, X., Moore, R., Wilton, M., Wong, M.J.Q., Lam, L., and Dong, T.G. (2015)  
892 Identification of divergent type VI secretion effectors using a conserved chaperone  
893 domain. *Proc Natl Acad Sci USA* **112**: 9106–9111.
- 894 Logan, S.L., Thomas, J., Yan, J., Baker, R.P., Shields, D.S., Xavier, J.B., *et al.* (2018) The  
895 *Vibrio cholerae* type VI secretion system can modulate host intestinal mechanics to  
896 displace gut bacterial symbionts. *Proc Natl Acad Sci USA* **115**: E3779–E3787.
- 897 Ma, A.T., McAuley, S., Pukatzki, S., and Mekalanos, J.J. (2009) Translocation of a *Vibrio*  
898 *cholerae* type VI secretion effector requires bacterial endocytosis by host cells. *Cell*  
899 *Host Microbe* **5**: 234–243.
- 900 Ma, A.T. and Mekalanos, J.J. (2010) *In vivo* actin cross-linking induced by *Vibrio cholerae*  
901 type VI secretion system is associated with intestinal inflammation. *Proc Natl Acad Sci*  
902 *USA* **107**: 4365–4370.
- 903 Matthey, N., Drebes Dörr, N.C., and Blokesch, M. (2018) Long-read-based genome  
904 sequences of pandemic and environmental *Vibrio cholerae* strains. *Microbiol Resour*  
905 *Announc* **7**: e01574-18.
- 906 McNally, L., Bernardy, E., Thomas, J., Kalziqi, A., Pentz, J., Brown, S.P., *et al.* (2017)  
907 Killing by type VI secretion drives genetic phase separation and correlates with  
908 increased cooperation. *Nat Commun* **8**: 14371.
- 909 Meibom, K.L., Blokesch, M., Dolganov, N.A., Wu, C.Y., and Schoolnik, G.K. (2005) Chitin  
910 induces natural competence in *Vibrio cholerae*. *Science* **310**: 1824–1827.
- 911 Metzger, L.C. and Blokesch, M. (2016) Regulation of competence-mediated horizontal gene  
912 transfer in the natural habitat of *Vibrio cholerae*. *Curr Opin Microbiol* **30**: 1–7.

- 913 Metzger, L.C., Stutzmann, S., Scignari, T., Van der Henst, C., Matthey, N., and Blokesch,  
914 M. (2016) Independent regulation of type VI secretion in *Vibrio cholerae* by TfoX and  
915 TfoY. *Cell Rep* **15**: 951–958.
- 916 Miller, M.C., Keymer, D.P., Avelar, A., Boehm, A.B., and Schoolnik, G.K. (2007) Detection  
917 and transformation of genome segments that differ within a coastal population of *Vibrio*  
918 *cholerae* strains. *Appl Environ Microbiol* **73**: 3695–3704.
- 919 Miyata, S.T., Kitaoka, M., Brooks, T.M., McAuley, S.B., and Pukatzki, S. (2011) *Vibrio*  
920 *cholerae* requires the type VI secretion system virulence factor vaxx to kill  
921 *Dictyostelium discoideum*. *Infect Immun* **79**: 2941–2949.
- 922 Miyata, S.T., Unterweger, D., Rudko, S.P., and Pukatzki, S. (2013) Dual expression profile  
923 of type VI secretion system immunity genes protects pandemic *Vibrio cholerae*. *PLoS*  
924 *Pathog* **9**: e1003752.
- 925 Mutreja, A., Kim, D.W., Thomson, N.R., Connor, T.R., Lee, J.H., Kariuki, S., *et al.* (2011)  
926 Evidence for several waves of global transmission in the seventh cholera pandemic.  
927 *Nature* **477**: 462–465.
- 928 Okada, K., Iida, T., Kita-Tsukamoto, K., and Honda, T. (2005) Vibrios commonly possess  
929 two chromosomes. *J Bacteriol* **187**: 752–757.
- 930 Olivier, V., Haines, G.K., Tan, Y., and Fullner Satchell, K.J. (2007) Hemolysin and the  
931 multifunctional autoprocessing RTX toxin are virulence factors during intestinal  
932 infection of mice with *Vibrio cholerae* El Tor O1 strains. *Infect Immun* **75**: 5035–5042.
- 933 Onifade, T.J.M., Hutchinson, R., van Zile, K., Bodager, D., Baker, R., and Blackmore, C.  
934 (2011) Toxin producing *Vibrio cholerae* O75 outbreak, United States, March to April  
935 2011. *Eurosurveillance* **16**: 20–22.
- 936 Pukatzki, S., Ma, A.T., Revel, A.T., Sturtevant, D., and Mekalanos, J.J. (2007) Type VI  
937 secretion system translocates a phage tail spike-like protein into target cells where it

- 938 cross-links actin. *Proc Natl Acad Sci USA* **104**: 15508–15513.
- 939 Pukatzki, S., Ma, A.T., Sturtevant, D., Krastins, B., Sarracino, D., Nelson, W.C., *et al.* (2006)
- 940 Identification of a conserved bacterial protein secretion system in *Vibrio cholerae* using
- 941 the *Dictyostelium* host model system. *Proc Natl Acad Sci USA* **103**: 1528–33.
- 942 Pukatzki, S., McAuley, S.B., and Miyata, S.T. (2009) The type VI secretion system:
- 943 translocation of effectors and effector-domains. *Curr Opin Microbiol* **12**: 11–17.
- 944 Rivera, I.N.G., Chun, J., Huq, A., Sack, R.B., and Colwell, R.R. (2001) Genotypes associated
- 945 with virulence in environmental isolates of *Vibrio cholerae*. *Appl Environ Microbiol* **67**:
- 946 2421–2429.
- 947 Russell, A.B., Hood, R.D., Bui, N.K., Leroux, M., Vollmer, W., and Mougous, J.D. (2011)
- 948 Type VI secretion delivers bacteriolytic effectors to target cells. *Nature* **475**: 343–349.
- 949 Russell, A.B., Leroux, M., Hathazi, K., Agnello, D.M., Ishikawa, T., Wiggins, P.A., *et al.*
- 950 (2013) Diverse type VI secretion phospholipases are functionally plastic antibacterial
- 951 effectors. *Nature* **496**: 508–512.
- 952 Russell, A.B., Peterson, S.B., and Mougous, J.D. (2014) Type VI secretion system effectors:
- 953 poisons with a purpose. *Nat Rev Microbiol* **12**: 137–148.
- 954 Salomon, D., Klimko, J.A., Trudgian, D.C., Kinch, L.N., Grishin, N. V., Mirzaei, H., and
- 955 Orth, K. (2015) Type VI secretion system toxins horizontally shared between marine
- 956 bacteria. *PLoS Pathog* **11**: e1005128.
- 957 Santoriello, F.J., Michel, L., Unterweger, D., and Pukatzki, S. (2019) *Vibrio cholerae* type VI
- 958 secretion system auxiliary cluster 3 is a pandemic-associated mobile genetic element.
- 959 *bioRxiv* doi: <https://doi.org/10.1101/868539> (preprint).
- 960 Lo Scudato, M. and Blokesch, M. (2013) A transcriptional regulator linking quorum sensing
- 961 and chitin induction to render *Vibrio cholerae* naturally transformable. *Nucleic Acids*
- 962 *Res* **41**: 3644–3658.

- 963 Lo Scrudato, M. and Blokesch, M. (2012) The regulatory network of natural competence and  
964 transformation of *Vibrio cholerae*. *PLoS Genet* **8(6)**: e1002778.
- 965 Seemann, T. (2014) Prokka: Rapid prokaryotic genome annotation. *Bioinformatics* **30**: 2068–  
966 2069.
- 967 Shapiro, B.J., Levade, I., Kovacikova, G., Taylor, R.K., and Almagro-Moreno, S. (2016)  
968 Origins of pandemic *Vibrio cholerae* from environmental gene pools. *Nat Microbiol* **2**:  
969 16240.
- 970 Shneider, M.M., Buth, S.A., Ho, B.T., Basler, M., Mekalanos, J.J., and Leiman, P.G. (2013)  
971 PAAR-repeat proteins sharpen and diversify the type VI secretion system spike. *Nature*  
972 **500**: 350–353.
- 973 De Souza Silva, O. and Blokesch, M. (2010) Genetic manipulation of *Vibrio cholerae* by  
974 combining natural transformation with FLP recombination. *Plasmid* **64**: 186–195.
- 975 Singh, D. V, Matte, M.H., Matte, G.R., Jiang, S., Sabeena, F., Shukla, B.N., *et al.* (2001)  
976 Molecular analysis of *Vibrio cholerae* O1, O139, non-O1, and non-O139 strains: clonal  
977 relationships between clinical and environmental isolates. *Appl Environ Microbiol* **67**:  
978 910–921.
- 979 Sommer, D.D., Delcher, A.L., Salzberg, S.L., and Pop, M. (2007) Minimus: A fast,  
980 lightweight genome assembler. *BMC Bioinformatics* **8**: 64.
- 981 Speare, L., Cecere, A.G., Guckes, K.R., Smith, S., Wollenberg, M.S., Mandel, M.J., *et al.*  
982 (2018) Bacterial symbionts use a type VI secretion system to eliminate competitors in  
983 their natural host. *Proc Natl Acad Sci USA* **115**: E8528–E8537.
- 984 Stubbendieck, R.M. and Straight, P.D. (2016) Multifaceted interfaces of bacterial  
985 competition. *J Bacteriol* **198**: 2145–2155.
- 986 Taylor, N.M.I., van Raaij, M.J., and Leiman, P.G. (2018) Contractile injection systems of  
987 bacteriophages and related systems. *Mol Microbiol* **108**: 6–15.



- 988 Taylor, R.K., Miller, V.L., Furlong, D.B., and Mekalanos, J.J. (1987) Use of *phoA* gene  
989 fusions to identify a pilus colonization factor coordinately regulated with cholera toxin.  
990 *Proc Natl Acad Sci USA* **84**: 2833–2837.
- 991 Unterweger, D., Kitaoka, M., Miyata, S.T., Bachmann, V., Brooks, T.M., Moloney, J., *et al.*  
992 (2012) Constitutive type VI secretion system expression gives *Vibrio cholerae* intra- and  
993 interspecific competitive advantages. *PLoS One* **7**: e48320.
- 994 Unterweger, D., Kostiuk, B., Otjengerdes, R., Wilton, A., Diaz-Satizabal, L., and Pukatzki, S.  
995 (2015) Chimeric adaptor proteins translocate diverse type VI secretion system effectors  
996 in *Vibrio cholerae*. *EMBO J* **34**: 2198–2210.
- 997 Unterweger, D., Miyata, S.T., Bachmann, V., Brooks, T.M., Mullins, T., Kostiuk, B., *et al.*  
998 (2014) The *Vibrio cholerae* type VI secretion system employs diverse effector modules  
999 for intraspecific competition. *Nat Commun* **5**: 3549.
- 1000 Veening, J.W. and Blokesch, M. (2017) Interbacterial predation as a strategy for DNA  
1001 acquisition in naturally competent bacteria. *Nat Rev Microbiol* **15**: 621–629.
- 1002 Waldor, M.K. and Mekalanos, J.J. (1996) Lysogenic conversion by a filamentous phage  
1003 encoding cholera toxin. *Science* **272**: 1910–1914.
- 1004 Wattam, A.R., Davis, J.J., Assaf, R., Boisvert, S., Brettin, T., Bun, C., *et al.* (2017)  
1005 Improvements to PATRIC, the all-bacterial bioinformatics database and analysis  
1006 resource center. *Nucleic Acids Res* **45**: D535–D542.
- 1007 Watve, S.S., Thomas, J., and Hammer, B.K. (2015) CytR is a global positive regulator of  
1008 competence, type VI secretion, and chitinases in *Vibrio cholerae*. *PLoS One* **10**:  
1009 e0138834.
- 1010 Weill, F.-X., Domman, D., Njamkepo, E., Tarr, C., Rauzier, J., Fawal, N., *et al.* (2017)  
1011 Genomic history of the seventh pandemic of cholera in Africa. *Science* **358**: 785–789.
- 1012 Weill, F.X., Domman, D., Njamkepo, E., Almesbahi, A.A., Naji, M., Nasher, S.S., *et al.*

- 1013 (2019) Genomic insights into the 2016–2017 cholera epidemic in Yemen. *Nature* **565**:  
1014 230–233.
- 1015 World Health Organization (WHO) (2006) Communicable diseases following natural  
1016 disasters: Risk assessment and priority interventions.
- 1017 Yildiz, F.H. and Schoolnik, G.K. (1998) Role of *rpoS* in stress survival and virulence of  
1018 *Vibrio cholerae*. *J Bacteriol* **180**: 773–784.
- 1019 Zhang, X.H. and Austin, B. (2005) Haemolysins in *Vibrio* species. *J Appl Microbiol* **98**:  
1020 1011–1019.
- 1021 Zheng, J., Ho, B., and Mekalanos, J.J. (2011) Genetic analysis of anti-amoebae and anti-  
1022 bacterial activities of the type vi secretion system in *Vibrio cholerae*. *PLoS One* **6**:  
1023 e23876.
- 1024 Zoued, A., Brunet, Y.R., Durand, E., Aschtgen, M.S., Logger, L., Douzi, B., *et al.* (2014)  
1025 Architecture and assembly of the Type VI secretion system. *Biochim Biophys Acta - Mol*  
1026 *Cell Res* **1843**: 1664–1673.

1027 **Figure legends**

1028 **Figure 1: Defense against amoebal predation by a subset of *V. cholerae* strains.** (A, D)

1029 Amoebal predation was scored using *D. discoideum* grazing assays in which formed plaques  
1030 on bacterial lawns were enumerated. Plaque numbers are indicated relative to those formed  
1031 on a lawn of *K. pneumoniae*, which served as a positive control. Bar plots represent the  
1032 average of at least three independent biological replicates ( $\pm$ SD). Statistical significance is  
1033 indicated (n.s., not significant; \*\*\*\*  $p < 0.0001$ ). (B and C) Hemolytic activity was tested on  
1034 blood agar plates. Pandemic *V. cholerae* strain A1552 as well as all environmental isolates  
1035 (B) or a representative subset together with their respective *hlyA*-minus derivatives (C) were  
1036 assessed for hemolysis.

1037

1038 **Figure 2: Constitutive T6SS activity linked to an ACD-containing effector inhibits**

1039 **amoebal grazing.** (A, C, F) Bacterial killing assays using *E. coli* as prey. Numbers of  
1040 surviving prey are depicted on the Y-axis (CFU/ml). Statistical significance in panel A is  
1041 shown above each strains' bar and calculated relative to the T6SS-silent negative control  
1042 strain A1552. #, for these strains, the killing activity was only reduced in one of the three  
1043 independent experiments. (B) T6SS activity in representative environmental strains. Hcp  
1044 detection in WT and  $\Delta vipA$  mutants of representative environmental isolates. Intracellular  
1045 (pellet) and secreted (supernatant) Hcp were assessed by immunoblotting using Hcp-directed  
1046 antibodies. Detection of  $\sigma 70$  served as a loading control. (D, G) T6SS- and ACD-dependency  
1047 of the anti-amoebal defense. Plaque formation by *D. discoideum* on bacterial lawns formed  
1048 by representative *V. cholerae* WT, *vipA* derivatives (D and G) and ACD-minus (G) strains.  
1049 Details as in Fig. 1. The toxigenic non-pandemic strain ATCC25872 and its site-directed  
1050 mutant served as control in panel G. (E) Simplified scheme of the T6SS. The actin  
1051 crosslinking domain (ACD) consists of a C-terminal extension of the VgrG1 tip protein and

1052 this multidomain protein is encoded by the *vgrGI* locus (shown on the right). Removal of the  
1053 ACD-encoding sequence was accomplished through site-directed integration of a stop codon  
1054 concomitantly with an *aph* selective marker. Bar plots in all panels represent the average of at  
1055 least three independent biological replicates ( $\pm$ SD). < dl, below detection limit. Statistical  
1056 significance is indicated (n.s., not significant; \*  $p < 0.05$ ; \*\*  $p < 0.01$ ; \*\*\*  $p < 0.001$ ; \*\*\*\*  $p$   
1057  $< 0.0001$ ; for panel A, each sample was compared to the A1552 control).

1058

1059 **Figure 3: T6SS effector/immunity typing scheme of pandemic and environmental *V.***  
1060 ***cholerae*.** The previously published phylogenetic tree was freely adapted from Keymer *et al.*  
1061 2007 (not fully to scale). The clade color code is depicted in the background. The E/I type of  
1062 each T6SS cluster (large cluster as well as auxiliary (aux) clusters 1, 2, 3 and 6) are  
1063 schematized for each strain. Large black arrows symbolize *vgrG* genes, which were classified  
1064 as structural (black) or evolved (colored tips, to represent the different types of C-terminal  
1065 effector domains). Large and small colored arrows represent effector and immunity genes,  
1066 respectively, according to the color code indicated in the legend below the scheme. Immunity  
1067 genes that are not adjacent to a putative effector gene are considered as orphan immunity  
1068 loci. \* depicts an orphan immunity gene from strain L6G whose gene product was slightly  
1069 below the amino acid identity threshold of 30% (20.3%) relative to C-type immunity  
1070 proteins. # depicts an orphan immunity gene that is a homolog to *bona fide* immunity genes  
1071 in other genomes. Effector genes in auxiliary clusters 1 and 2 of strain W10G (marked in  
1072 figure with a pattern) were wrongly annotated in the PacBio genome sequence due to a  
1073 frameshift sequencing artifact splitting each gene into two ORFs; this sequencing error was  
1074 corrected by Sanger sequencing and the corrected single gene is shown in this figure.

1075

1076 **Figure 4: Competitiveness among environmental strains.** Graphs in all panels represent  
1077 bacterial killing assays as described in Fig. 2 using the predator strains as indicated on the X-  
1078 axes and as prey: (A) the pandemic *V. cholerae* strain A1552; (B) representative *vipA*-minus  
1079 ( $\Delta$ T6SS) mutants of the environmental isolates as shown above the graph; or (C to Q) each  
1080 environmental isolate as shown in the graph title for each panel and on the Y-axis. Plots  
1081 represent the average of three independent biological replicates ( $\pm$ SD). < dl, below the  
1082 detection limit. Statistical significance is indicated (n.s., not significant; \*  $p < 0.05$ ; \*\*  $p <$   
1083  $0.01$ ; \*\*\*  $p < 0.001$ ; \*\*\*\*  $p < 0.0001$ ).  
1084

1085 **Supporting tables and figure legends**

1086 **Table S1.** *Vibrio cholerae*, *Escherichia coli* and *Klebsiella pneumoniae* strains used in this  
1087 study.

1088 **Table S2.** Information of the long-read whole genome sequencing data and assemblies of  
1089 NCBI BioProject PRJNA633476.

1090 **Table S3.** BlastP-predicted T6SS effector and immunity proteins<sup>1</sup> of the environmental *V.*  
1091 *cholerae* isolates.

1092 **Table S4.** Matrices of % identity (percentage of residues that are identical) among the  
1093 effector and immunity proteins harbored in the T6SS large cluster from the *V. cholerae*  
1094 environmental strains and the pandemic A1552 strain.

1095 **Table S5.** Matrices of % identity (percentage of residues that are identical) among the  
1096 effector and immunity proteins harbored in the T6SS auxiliary cluster 1 from the *V. cholerae*  
1097 environmental strains and the pandemic A1552 strain.

1098 **Table S6.** Matrices of % identity (percentage of residues that are identical) among the  
1099 effector and immunity proteins harbored in the T6SS auxiliary cluster 2 from the *V. cholerae*  
1100 environmental strains and the pandemic A1552 strain.

1101

1102 **Supplementary Fig. S1: Scheme of T6SS auxiliary cluster 6 of strain SP7G.** The 4.1-kb  
1103 long auxiliary T6SS cluster carried on the chromosome 2 of strain SP7G (locus tags VC-  
1104 SP7G\_03229 to VC-SP7G\_03234 from CP053809) is depicted. Gene symbols are explained  
1105 below the scheme.

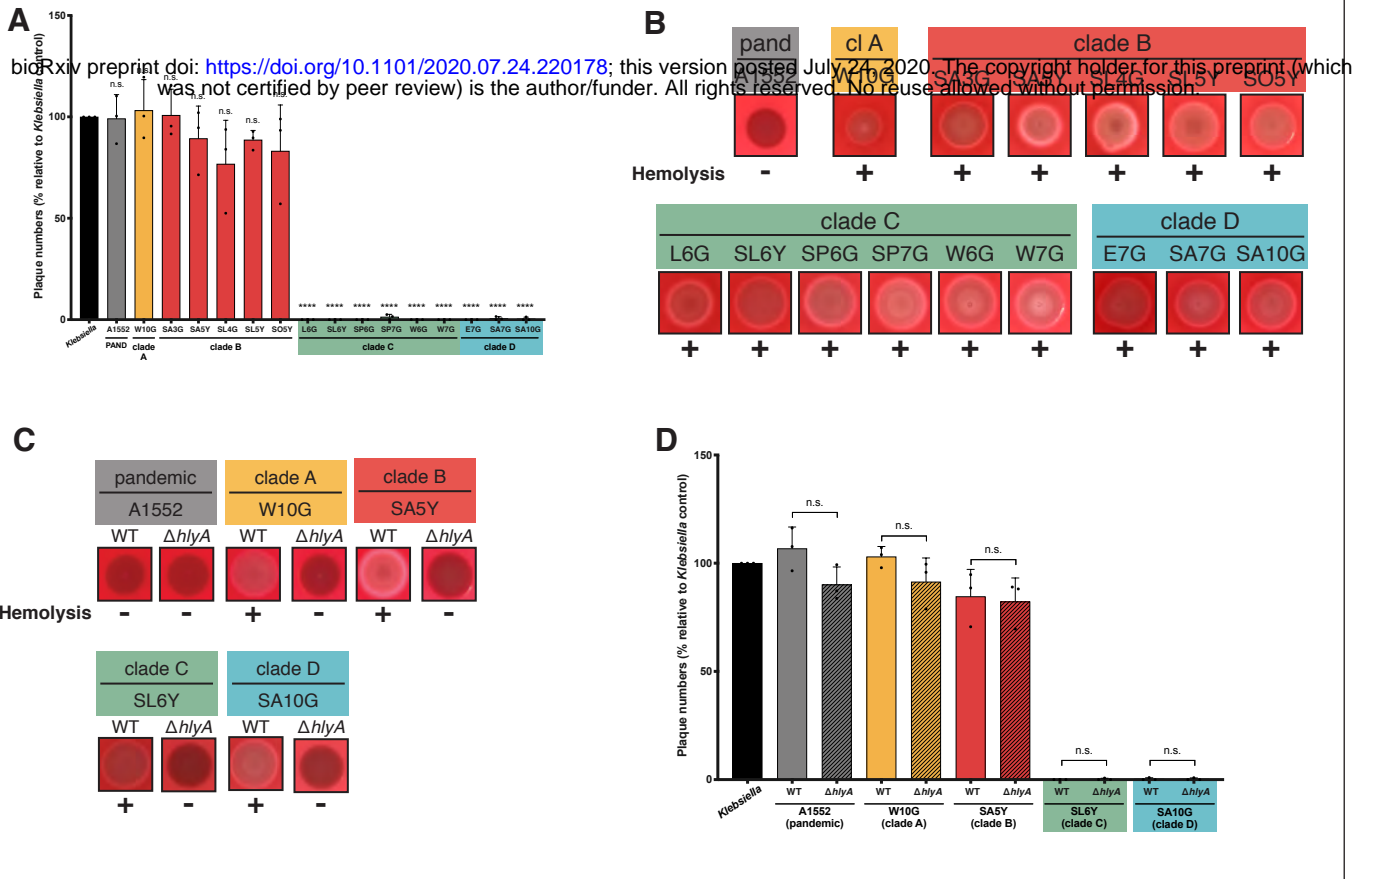

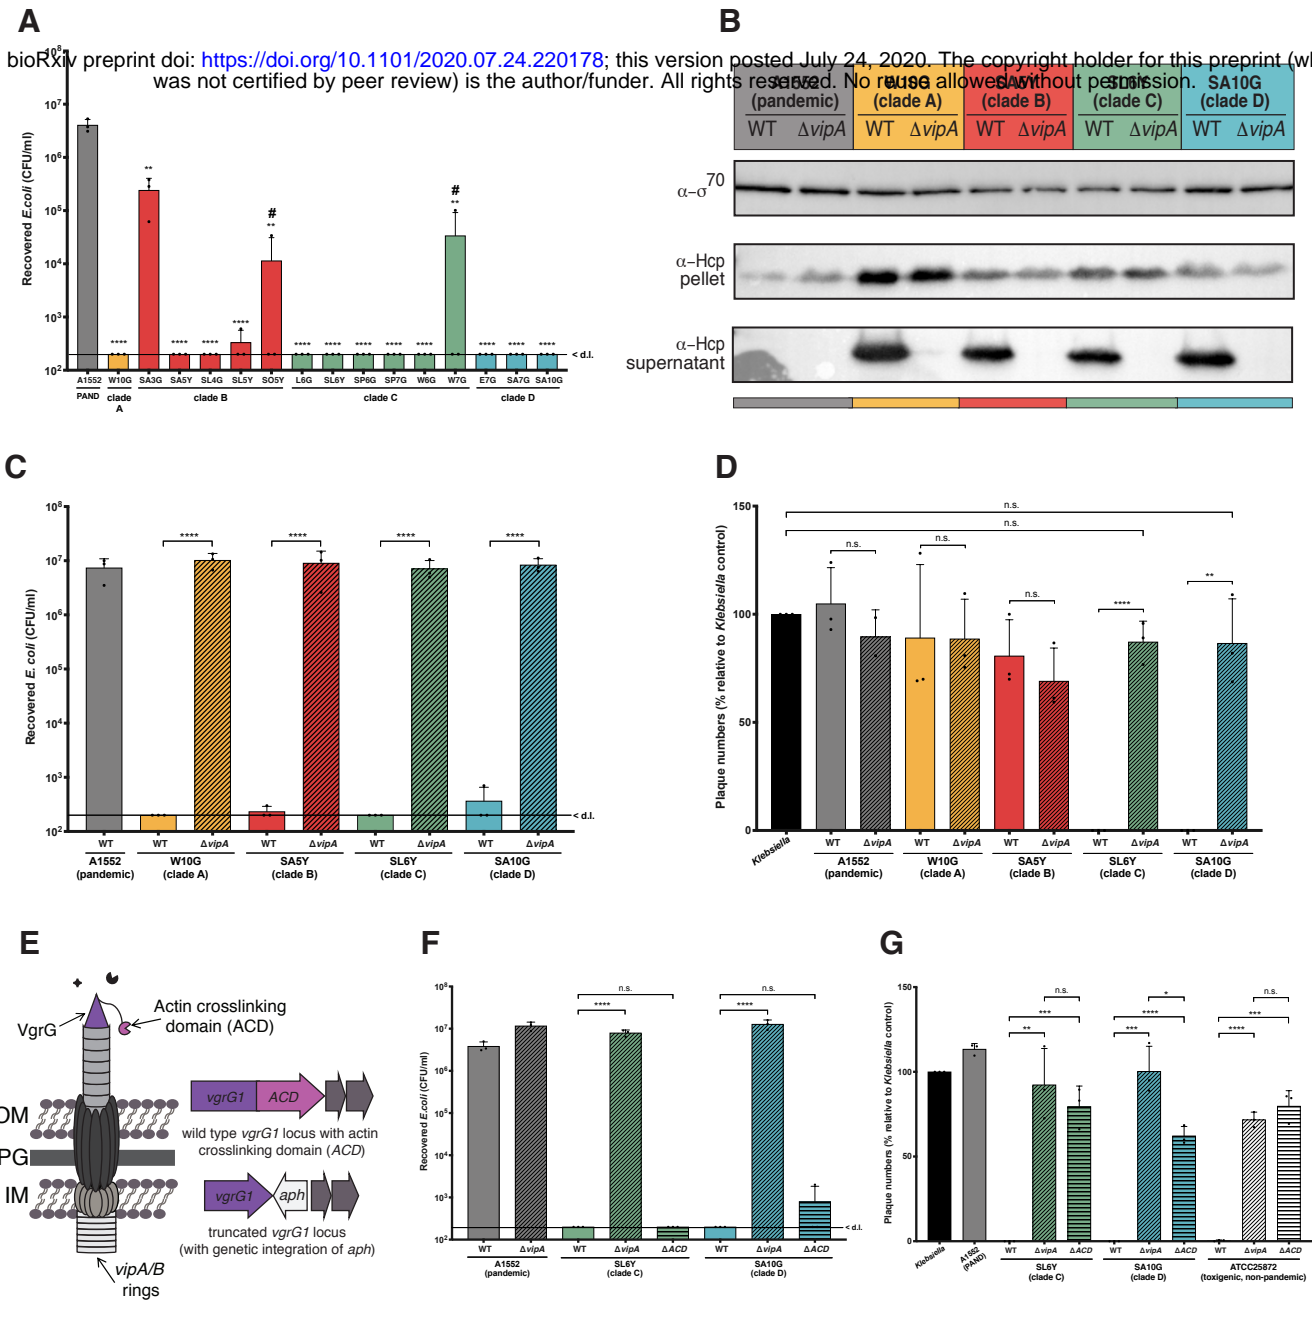



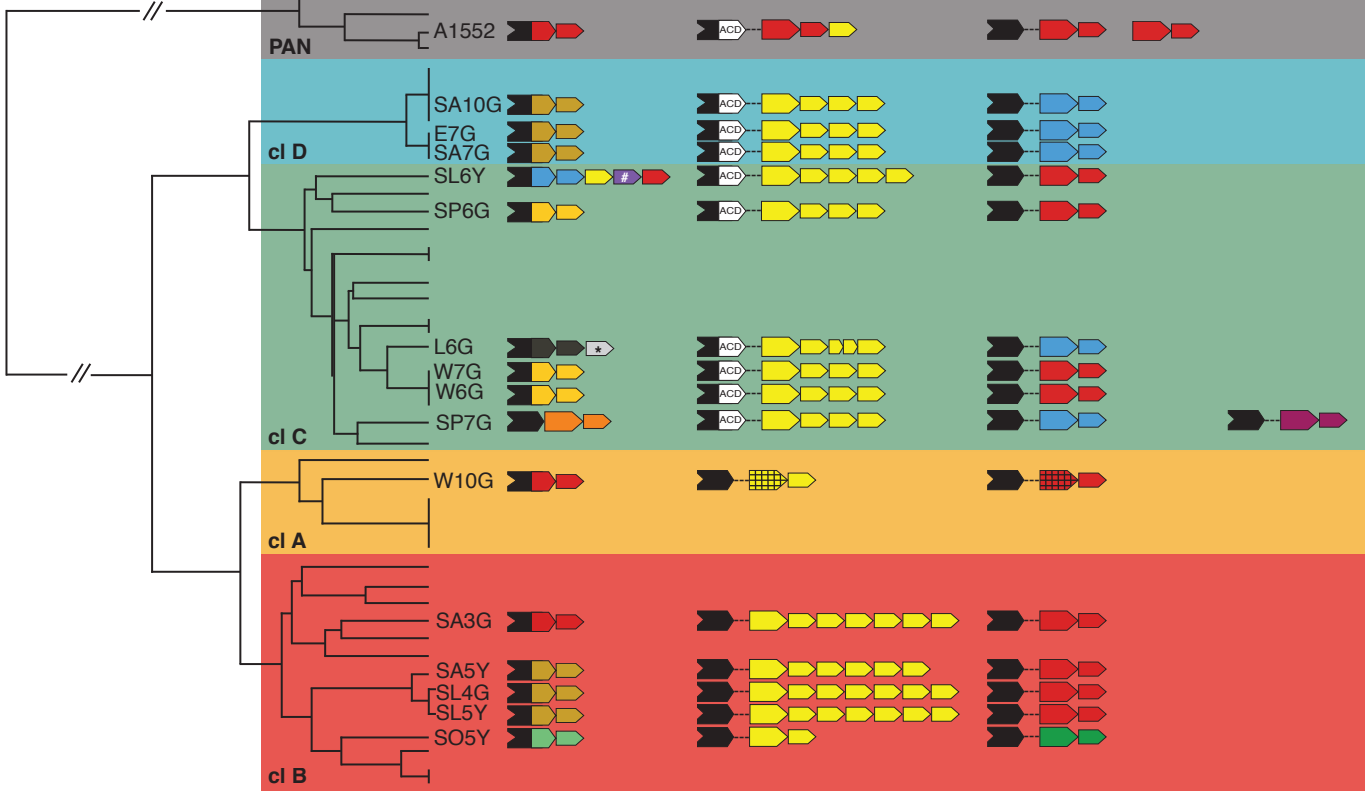

### Effector and immunity modules in T6SS clusters

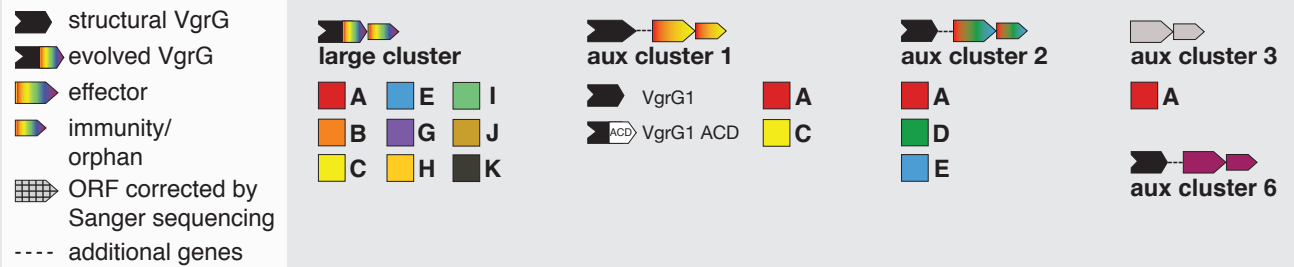

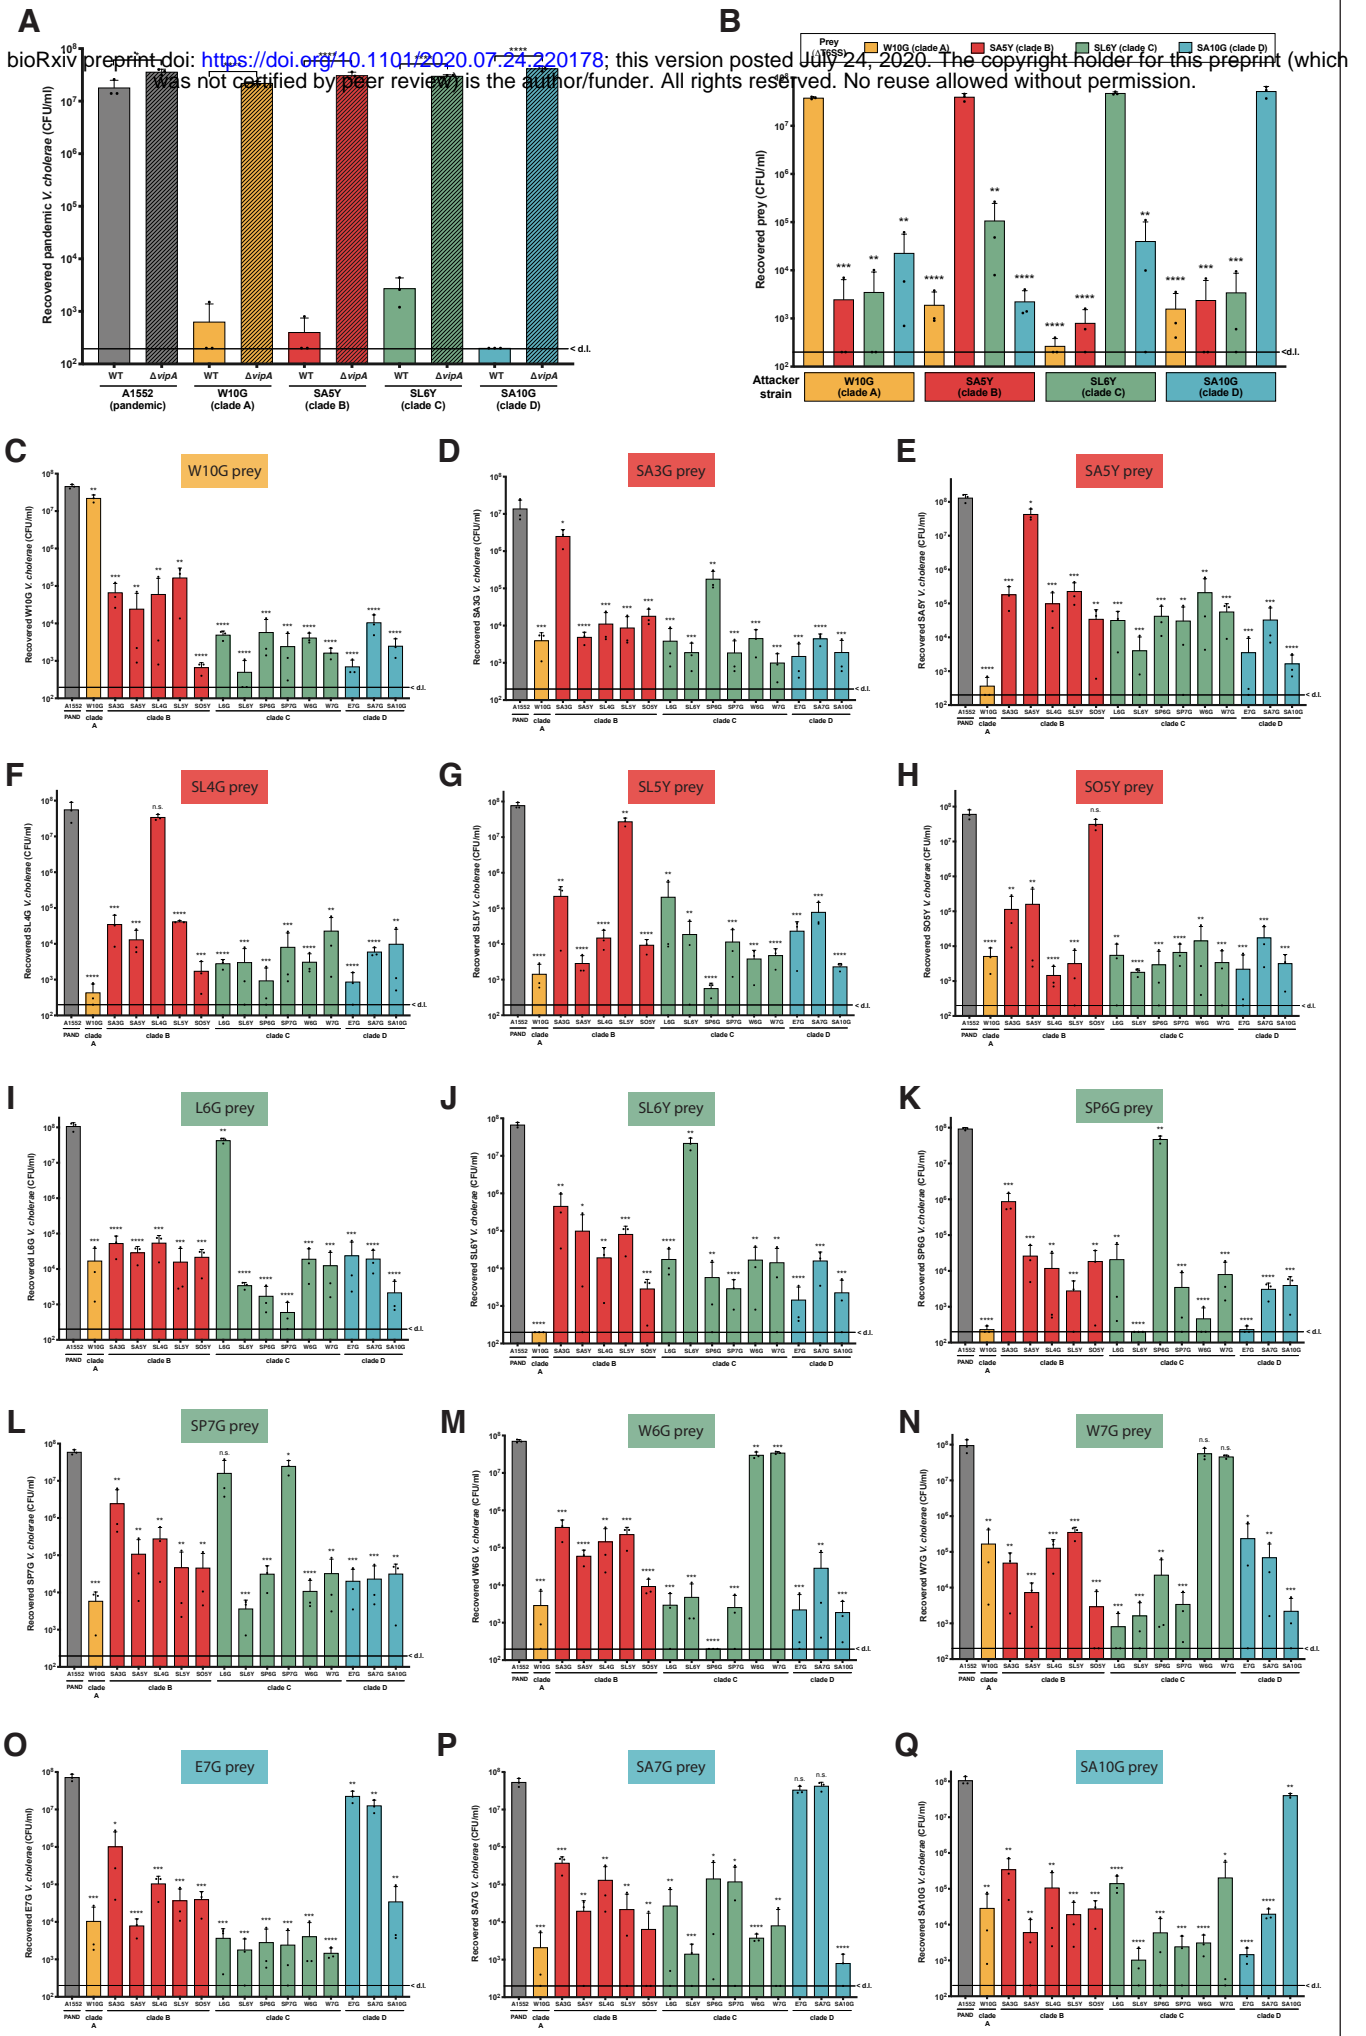

Source: https://www.biorxiv.org/content/10.1101/2020.07.24.220178v1.full.pdf
